# ***In vivo* multi-parametric manganese-enhanced MRI for detecting senile plaques in rodent models of Alzheimer's disease**

Eugene Kim<sup>\*a</sup>, Davide Di Censo<sup>b</sup>, Mattia Baraldo<sup>c</sup>, Camilla Simmons<sup>a</sup>, Ilaria Rosa<sup>b</sup>, Karen Randall<sup>a</sup>, Clive Ballard<sup>d</sup>, Ben R Dickie<sup>e</sup>, Steven CR Williams<sup>f</sup>, Richard Killick<sup>†c</sup>, Diana Cash<sup>†a</sup>

\*Corresponding author: [eugene.kim@kcl.ac.uk](mailto:eugene.kim@kcl.ac.uk)

†Joint senior authors

- a. BRAIN Centre (Biomarker Research And Imaging for Neuroscience), Department of Neuroimaging, King's College London, The James Black Centre, 125 Coldharbour Lane, London SE5 9NU, UK
- b. Department of Life, Health and Environmental Sciences, University of L'Aquila, Piazzale Salvatore Tommasi 1, 67100 L'Aquila, Italy
- c. Department of Old Age Psychiatry, King's College London, Institute of Psychiatry, Psychology & Neuroscience, 16 De Crespigny Park, London SE5 8AF, UK
- d. The University of Exeter Medical School, Medical School Building, St Luke's Campus, Magdalen Road, Exeter EX1 2LU, UK
- e. Division of Neuroscience and Experimental Psychology, Faculty of Biology Medicine and Health, The University of Manchester, Stopford Building, 99 Oxford Road, Manchester M13 9PG, UK
- f. Department of Neuroimaging, King's College London, Centre for Neuroimaging Sciences, De Crespigny Park, London SE5 8AF, UK

## Highlights

- This is the first study to use manganese-enhanced MRI (MEMRI) for direct visualization of senile plaques in rodent models of Alzheimer's disease, *in vivo*.
- Manganese enhancement is not necessary to detect plaques but improves image contrast and signal-to-noise ratio.
- Manganese binds to plaques in 5xFAD mice but not in TgF344-AD rats, demonstrating potential as a targeted contrast agent for imaging plaques in certain models of AD.

## 1 Abstract

2 Senile plaques are a hallmark of Alzheimer's disease (AD) that develop in its earliest  
3 stages. Thus, non-invasive detection of these plaques would be invaluable for diagnosis  
4 and the development and monitoring of treatments, but this remains a challenge due to  
5 their small size. Here, we investigated the utility of manganese-enhanced MRI (MEMRI) for  
6 visualizing plaques in transgenic rodent models of AD across two species: 5xFAD mice and  
7 TgF344-AD rats.

8 Fourteen mice (eight transgenic, six wild-type) and eight rats (four transgenic, four wild-  
9 type) were given subcutaneous injections of  $MnCl_2$  and imaged *in vivo* using a 9.4T Bruker  
10 scanner. Susceptibility-weighted images, transverse relaxation rate ( $R2^*$ ) maps, and  
11 quantitative susceptibility maps were derived from high-resolution 3D multi-gradient-echo  
12 (MGE) data to directly visualize plaques. Longitudinal relaxation rate ( $R1$ ) maps were  
13 derived from MP2RAGE data to measure regional manganese uptake. After scanning, the  
14 brains were processed for histology and stained for beta-amyloid (4G8 antibody), iron  
15 (Perl's), and calcium/manganese (Alizarin Red).

16  $MnCl_2$  improved signal-to-noise ratio ( $1.55 \pm 0.39$ -fold increase in MGE images) as expected,  
17 although this was not necessary for detection of plaques in the high-resolution images.  
18 Plaques were visible in susceptibility-weighted images,  $R2^*$  maps, and quantitative  
19 susceptibility maps, with increased  $R2^*$  and more positive magnetic susceptibility compared  
20 to surrounding tissue.

21 In the 5xFAD mice, most MR-visible plaques were in the hippocampus, though histology  
22 confirmed plaques in the cortex and thalamus as well. In the TgF344-AD rats, many more

23 plaques were MR-visible throughout the hippocampus and cortex. Beta-amyloid and iron  
24 staining indicate that, in both models, MR visibility was driven by plaque size and iron load.  
25 Voxel-wise comparison of R1 maps revealed increased manganese uptake in brain regions  
26 of high plaque burden in transgenic animals compared to their wild-type littermates.  
27 Interestingly, in contrast to plaque visibility in the high-resolution images, the increased  
28 manganese uptake was limited to the rhinencephalon in the TgF344-AD rats (family-wise  
29 error (FWE)-corrected  $p < 0.05$ ) while it was most significantly increased in the cortex of the  
30 5xFAD mice (FWE-corrected  $p < 0.3$ ). Alizarin Red staining suggests that manganese  
31 bound to plaques in 5xFAD mice but not in TgF344-AD rats.  
32 Multi-parametric MEMRI is a simple, viable method for detecting senile plaques in rodent  
33 models of AD. Manganese-induced signal enhancement can enable higher-resolution  
34 imaging, which is key to visualizing these small amyloid deposits. We also present *in vivo*  
35 evidence of manganese as a potential targeted contrast agent for imaging plaques in the  
36 5xFAD model of AD.

## 37 Keywords

38 Alzheimer's disease; beta-amyloid; iron; magnetic resonance imaging; manganese;  
39 quantitative susceptibility mapping; senile plaque

## 40 Abbreviations

|           |                                                               |
|-----------|---------------------------------------------------------------|
| AD        | Alzheimer's disease                                           |
| A $\beta$ | beta-amyloid                                                  |
| CNR       | contrast-to-noise ratio                                       |
| DAB       | 3,3'-Diaminobenzidine                                         |
| FWE       | family-wise error                                             |
| GBCA      | gadolinium-based contrast agents                              |
| MRI       | magnetic resonance imaging                                    |
| MEMRI     | manganese-enhanced MRI                                        |
| MGE       | multi-gradient-echo                                           |
| Mn-       | MnCl <sub>2</sub> -naïve                                      |
| Mn+       | treated with MnCl <sub>2</sub>                                |
| MP2RAGE   | magnetization prepared 2 rapid acquisition of gradient echoes |

|     |                                     |
|-----|-------------------------------------|
| PBS | phosphate-buffered saline           |
| QSM | quantitative susceptibility mapping |
| ROI | region-of-interest                  |
| SNR | signal-to-noise ratio               |
| SWI | susceptibility-weighted image       |
| TBS | Tris-buffered saline                |
| TE  | echo time                           |
| TI  | inversion time                      |
| UTE | ultra-short echo time               |

41

42

43

## 44 1 Introduction

45 Senile plaques (extracellular deposits of beta-amyloid ( $A\beta$ ) in the brain) are one of the two  
46 neuropathological hallmarks of Alzheimer's disease (AD) and develop early in the disease  
47 progression. However, early diagnosis of AD is limited by the difficulty of visualizing  $A\beta$   
48 plaques *in vivo*. Currently, a definitive diagnosis of Alzheimer's disease (AD) is only made  
49 *postmortem* by observing senile plaques and neurofibrillary tangles (intracellular deposits of  
50 hyperphosphorylated forms of the tau protein) in brain sections.

51 A diagnosis of AD during life can be greatly aided by positron emission tomography  
52 detection of radioactive  $A\beta$  ligands such as PiB (Mathis et al., 2012). Although highly  
53 accurate (Jack et al., 2018), the implementation of PET is restricted by high cost, limited  
54 accessibility, and invasiveness (ionizing radiation). Thus, non-invasive and repeatable  
55 methods of detecting plaques, or other facets of AD pathology, are needed to provide  
56 biomarkers of AD for refining diagnosis and assessing therapeutic efficacy.

57 MRI has shown great potential in filling this need (Ten Kate et al., 2018), but *in vivo* MR  
58 imaging of senile plaques remains challenging due to the small size of plaques and the  
59 relatively low sensitivity of MRI.

60 Previous preclinical studies on *in vivo* MR imaging of AD plaques involved complex pulse  
61 sequences (Jack et al., 2004) or administration of T1-shortening gadolinium-based contrast  
62 agents (GBCA) to increase the signal-to-noise ratio (SNR). GBCAs enable high-resolution  
63 imaging at reduced scan times, but complex procedures are required to deliver them to the  
64 brain parenchyma, e.g., stereotactic surgery for intracerebroventricular injection (Petiet et  
65 al., 2012) or the use of ultrasound and microbubbles to transiently open the blood-brain  
66 barrier (Santin et al., 2013).

67 Like Gd(III), manganese(II) is paramagnetic and shortens T1 relaxation times, but  
68 manganese-based contrast agents have lower relaxivities (i.e., produce a smaller decrease  
69 in T1 per unit of contrast agent concentration) than GBCAs (Brandt et al., 2019). Unlike  
70 GBCAs,  $MnCl_2$ , a contrast agent commonly used for manganese-enhanced MRI (MEMRI),  
71 readily crosses the blood-brain barrier and, as a calcium analog, is taken up by neurons  
72 (Massaad & Pautler, 2011). Thus, in addition to enhancing SNR and neuroanatomical  
73 contrast, MEMRI can provide functional information. Accordingly, MEMRI has been used to  
74 probe AD-related disruption of neural activity and shown both increased (Fontaine et al.,

75 2017; Tang et al., 2016) and decreased (Badea et al., 2019; Perez et al., 2013) Mn(II)  
76 uptake in different mouse models.

77 An overview of the use of MEMRI in neurodegenerative models is given in the recent  
78 review article by Saar and Koretsky (Saar & Koretsky, 2018).

79 In this study, we investigated the feasibility of using Mn(II) as a GBCA alternative to  
80 enhance image contrast and SNR to aid the *in vivo* visualization of senile plaques. We  
81 tested our MEMRI technique in two rodent models of AD:

82 1) The well-characterized 5xFAD transgenic mouse model of AD, which express human  
83 APP with the Swedish (K670N/M671L), Florida (I716V), and London (V717I) mutations and  
84 human PSEN1 with the M146L and L286V mutations and start developing A $\beta$  plaques from  
85 as early as two months of age (Oakley et al., 2006).

86 2) The TgF344-AD transgenic rat model of AD, which express human APP with the  
87 Swedish mutation and human PSEN1 with the  $\Delta$  exon 9 mutation and start developing A $\beta$   
88 plaques from as early as six months of age (Cohen et al., 2013).

## 89 2 Materials and methods

### 90 2.1 Experimental design

91 All experimental procedures involving animals were performed in accordance with the UK  
92 Animals (Scientific Procedures) Act 1986 and King's College London institutional ethical  
93 guidelines.

94 All mice and rats were bred in in-house colonies. This study included eight 8–9.5-month-old  
95 5xFAD mice, six of their wild-type littermates, four 16.5–18.5-month-old TgF344-AD rats,  
96 and four of their wild-type littermates (**Figure 1**). Half of the mice were male and half female  
97 across both genotypes, while all of the rats were male. A subset of six 5xFAD mice (3 male,  
98 3 female) underwent baseline MRI scans. Immediately afterwards, these and all other  
99 animals received s.c. injections of MnCl<sub>2</sub> (Sigma-Aldrich), once daily for four days. The  
100 mice received 0.15 mmol/kg/day (1.5 ml of 0.1M solution diluted in 1 ml of sterile 0.9%  
101 saline) for a cumulative dose of 0.6 mmol/kg; the rats received 0.075 mmol/kg/day (0.75 ml  
102 of 0.1M solution diluted in 1 ml of sterile 0.9% saline) for a cumulative dose of 0.3 mmol/kg.

103 These doses were determined in a pilot study on a separate cohort of wild-type animals; a  
104 0.6 mmol/kg cumulative dose resulted in mild adverse effects in the rats, thus a lower dose  
105 was used for this study.

106 MEMRI was performed on all animals one day after the final MnCl<sub>2</sub> injection. Immediately  
107 after scanning, the animals were killed by transcardiac perfusion with heparinized saline  
108 and 4% formaldehyde. The fixed brains were harvested for histological analysis.

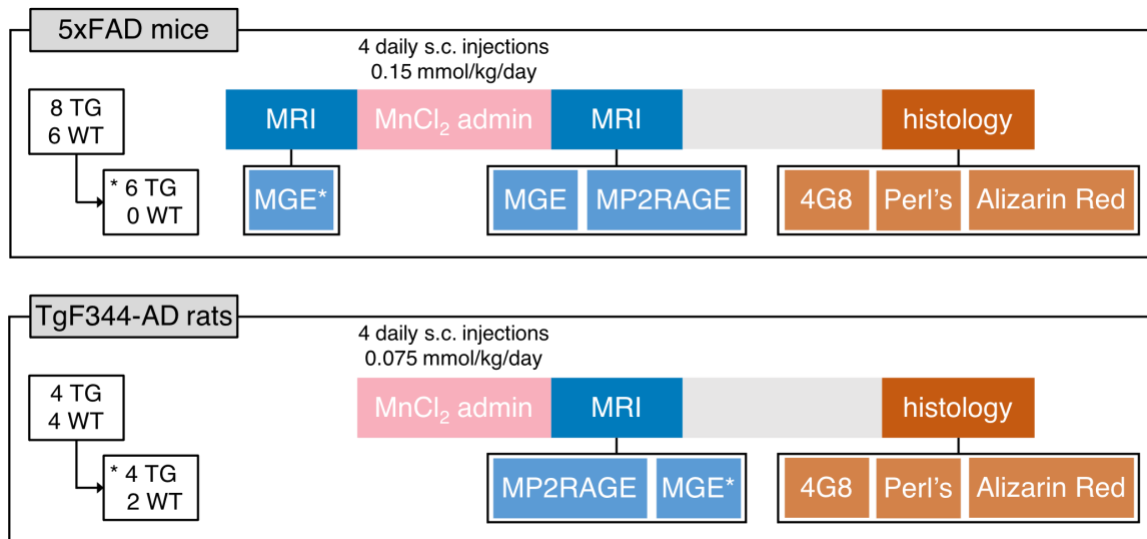

**Figure 1. Experimental design.** Fourteen mice (8 5xFAD transgenics [TG] and 6 wild-types [WT]) were scanned, including a subset of 6 TG mice that were scanned before MnCl<sub>2</sub> administration (day 0). All mice were scanned after 4 days of daily s.c. MnCl<sub>2</sub> injections (day 4). Eight rats (4 TgF344-AD TG and 4 WT) were scanned after MnCl<sub>2</sub> administration (day 4). The MGE scan was only acquired for 4 TG and 2 WT rats. After the post-Mn scan, all animals were culled and their brains processed for histological analysis, which included 4G8 (A $\beta$ ), Perl's (iron), and Alizarin Red (calcium/manganese) staining.

## 109 2.2 MRI acquisition

110 All MRI experiments were performed on a 9.4T Bruker BioSpec 94/20 controlled by  
111 ParaVision (6.0.1 for mice and 7.0.0 for rats) at the BRAIN Centre (<http://brain-imaging.org>)  
112 at King's College London. An 86-mm volume coil was used in combination with species-  
113 specific, receive-only 2x2 surface array coils designed for mouse or rat brain imaging. The  
114 animals were anesthetized with isoflurane (5% induction, ~2% maintenance) in medical air  
115 (1 L/min) + medical oxygen (0.4 L/min). During scanning, the isoflurane level was adjusted  
116 to maintain the respiration rate at 75-85 breaths/min for mice and 50-60 breaths/min for  
117 rats. Body temperature was monitored with a rectal probe and maintained at 37 $\pm$ 0.5 $^{\circ}$ C  
118 using a warm water circulation system (Small Animal Instruments, Inc., Stony Brook, NY,  
119 USA).

120 Images were acquired using the following sequences (sequence parameters are  
121 summarized in **Table 1**):

- 122 1. 3D ultra-short echo time (UTE)
- 123 2. Magnetization prepared 2 rapid acquisition of gradient echoes (MP2RAGE)
- 124 3. High-resolution 3D multi-gradient-echo (MGE)

**Table 1** MRI sequence parameters

| Parameter              | UTE           |               | MP2RAGE       |               | MGE           |                               |
|------------------------|---------------|---------------|---------------|---------------|---------------|-------------------------------|
|                        | Mouse         | Rat           | Mouse         | Rat           | Mouse         | Rat                           |
| TE (ms)                | 0.008         | 0.008         | 2.5           | 2.7           | 5, 12, 19, 26 | 6.2, 14.85, 23.5, 32.15, 40.8 |
| TR (ms)                | 3.75          | 3.75          | 7             | 7.05          | 250           | 150                           |
| TR <sub>MP2</sub> (ms) | n/a           | n/a           | 7000          | 9000          | n/a           | n/a                           |
| TI (ms)                | n/a           | n/a           | 700, 3500     | 900, 3500     | n/a           | n/a                           |
| FA (°)                 | 3.9           | 3.9           | 7, 7          | 7, 9          | 50            | 30                            |
| BW (kHz)               | 81.5          | 81.5          | 40            | 50            | 40            | 40                            |
| Matrix                 | 80×80×80      | 128×128×128   | 108×108×64    | 160×160×100   | 200×150×20    | 300×230×40                    |
| FOV (mm)               | 36×36×36      | 58×58×58      | 16.2×16.2×9.6 | 30.4×30.4×19  | 12×9×4.8      | 18×13.8×9.6                   |
| Voxel size (µm)        | 450 isotropic | 453 isotropic | 150 isotropic | 190 isotropic | 60×60×240     | 60×60×240                     |
| Averages               | 1             | 1             | 4             | 1             | 4             | 4                             |
| Scan time              | 1 m 15 s      | 3 m 13 s      | 33 m          | 18 m          | 60 m          | 1 h 50 m                      |

TE: echo time, TR: repetition time, TR<sub>MP2</sub>: MP2RAGE segment repetition time, TI: inversion time, FA: flip angle, BW: receiver bandwidth, FOV: field-of-view

125

126 The UTE and MP2RAGE sequences provided whole brain coverage, while the MGE  
127 sequence provided partial coverage along the rostrocaudal axis; the MGE slice package  
128 was positioned to include all of the hippocampus. The pre-Mn baseline scan sessions for  
129 the subset of six 5xFAD mice included only the MGE and UTE scans. All three scans were  
130 acquired in the post-Mn MEMRI sessions for all animals except for two wild-type rats, for  
131 which MGE scans were not acquired. One wild-type mouse was found to have  
132 hydrocephalus (**Figure 4**, second row, right) and thus excluded from the MP2RAGE  
133 processing and analysis described below.



## 134 2.3 MRI processing and analysis

### 135 2.3.1 MP2RAGE

136 Both magnitude and complex MP2RAGE and UTE images were reconstructed in  
137 ParaVision. The complex images from the four channels of the array coil were combined  
138 with the COMPOSER method, which uses the UTE reference scan to correct for differing  
139 phase offsets in the images from the individual coils in the array (Robinson et al., 2017).  
140 This was implemented in the wrapper script `composer.sh`, which is part of the  
141 QUantitative Imaging Tools (QUIT) package (<https://github.com/spinacist/QUIT>) (Wood,  
142 2018). From the combined complex MP2RAGE image, bias-field-corrected T1w images and  
143 T1 maps were computed using the `mp2rage` command in QUIT, which produces robust  
144 T1w images by suppressing background noise (O'Brien et al., 2014). The noise  
145 suppression constant  $\beta$  was empirically optimized and set to 1 for all mouse data and 0.05  
146 for all rat data. R1 maps were made by calculating the reciprocal of the T1 maps.

147 Study-specific T1w mouse and rat templates were created using the ANTs script  
148 `antsMultivariateTemplateConstruction2.sh`, and each subject was registered to  
149 its respective template using `antsRegistration` with serial rigid-body, affine, and SyN  
150 transformations (Avants et al., 2008).

151 Each R1 map was transformed to the template space, and R1 values were normalized by  
152 the median R1 value in a temporalis region-of-interest (ROI) manually defined on the  
153 template image. The rationale was to correct for any inter-subject differences in effective  
154 Mn(II) dose on the assumption that genotype did not affect Mn(II) uptake in the temporalis.  
155 To determine if R1 differed between transgenic and wild-type animals, voxel-wise  
156 permutation tests were performed using FSL `randomise` with 5000 permutations,  
157 threshold-free cluster enhancement, and controlling for family-wise error (FWE) rate  
158 (Winkler et al., 2014).

### 159 2.3.2 MGE

160 Magnitude, complex, and susceptibility-weighted images (SWI) were reconstructed from the  
161 MGE data in ParaVision. The 'positive-mask' SWI reconstruction weighting mode was used,  
162 with a mask weighting of 4.0 and Gauss broadening of 0.2 mm.

163 The magnitude and susceptibility-weighted images were bias field corrected using the  
164 `N4BiasFieldCorrection` command in ANTs (Tustison et al., 2010). Then, individual

165 echo time (TE) images were averaged to create magnitude and SWI “meanTE” images to  
166 increase SNR (Helms & Dechent, 2009). R2\* maps were computed from the uncorrected  
167 MGE magnitude images using the non-linear fitting algorithm of the `multiecho` command  
168 in QUIT.

169 The complex images were combined as described above, from which magnitude and phase  
170 images were extracted for quantitative susceptibility mapping (QSM). Magnetic  
171 susceptibility ( $\chi$ ) maps were computed using the STAR-QSM algorithm (Wei et al., 2015) in  
172 STI Suite v3.0, a MATLAB (MathWorks, Natick, MA, USA) toolbox. Brain masks, which are  
173 required by the QSM algorithm, were generated from the uncorrected first TE magnitude  
174 images using the Rapid Automatic Tissue Segmentation (RATS) tool (Oguz et al., 2014).  
175 Thus, four image contrasts or parametric maps were derived from the MGE data:

- 176 1. magnitude meanTE images,
- 177 2. SWI meanTE images,
- 178 3. R2\* maps, and
- 179 4. QSM maps.

180 Using Fiji (Schindelin et al., 2012), the SNR of magnitude meanTE images were estimated  
181 from manually drawn ROIs around the brain and background in a central slice, where

$$182 \quad \text{SNR} = \frac{\text{mean brain signal}}{\text{s.d. of background signal}}.$$

183 For one 5xFAD mouse and one TgF344-AD rat each, eight randomly selected plaques and  
184 their neighborhoods were manually segmented from a single slice of the SWI meanTE  
185 image using Fiji. Any voxels containing blood vessels or white matter were excluded from  
186 the neighborhoods. The contrast-to-noise ratios (CNR) in the magnitude and SWI meanTE  
187 images were computed for each plaque, where

$$188 \quad \text{CNR} = \frac{|\text{mean plaque signal} - \text{mean neighborhood signal}|}{\text{s.d. of background signal}}.$$

189 In addition, local contrast, defined here as

$$190 \quad \text{local contrast} = \frac{|\text{mean plaque signal} - \text{mean neighborhood signal}|}{\text{s.d. of neighborhood signal}},$$

191 was calculated for each plaque in each of the four MGE-derived images/maps.

## 192 2.4 Histology

193 Perfusion-fixed brains were extracted and cryoprotected in 30% sucrose before being  
194 sectioned at 35  $\mu\text{m}$  in a series of 6 for mouse and 12 for rat on a freezing microtome and  
195 stored free floating in cryoprotectant at  $-20^{\circ}\text{C}$ . For mice and rats, Alizarin Red was used to  
196 stain for calcium and manganese, Perl's/DAB for iron, and 4G8 antibody for  $\text{A}\beta$ .

197 For Alizarin Red, one series was mounted onto slides and air dried before rehydrating in  
198 distilled  $\text{H}_2\text{O}$  and incubating in Alizarin Red solution for 2 min. Sections were then  
199 differentiated in acetone then acetone:xylene (1:1) and finally were cleared in xylene before  
200 coverslipping.

201 For Perl's/DAB, one series was washed for 3 x 5 min in phosphate-buffered saline (PBS)  
202 before being incubated in 0.3% hydrogen peroxide ( $\text{H}_2\text{O}_2$ ) for 30 min, then in Perl's solution  
203 (1% Potassium Ferrocyanide Trihydrate in acidified PBS) for 1 hour at  $37^{\circ}\text{C}$ , and finally in  
204 3,3'-Diaminobenzidine (DAB) for up to 10 min until sufficient colour had developed (PBS  
205 wash steps were performed in between each incubation). Sections were then mounted onto  
206 slides, air dried, and coverslipped.

207 For 4G8, one series was washed for 3 x 5 min in Tris-buffered saline (TBS) before being  
208 incubated in 88% formic acid for 15mins for antigen retrieval, then in 1%  $\text{H}_2\text{O}_2$  for 15 min to  
209 block endogenous peroxidase activity, 10% skimmed milk powder to block non-specific  
210 binding, and finally in anti-4G8 antibody (1:2,000; BioLegend (800701)) overnight at  $4^{\circ}\text{C}$ .  
211 This was followed by incubation in a biotinylated secondary antibody (anti mouse in goat,  
212 1:1000, Vector Labs (BA-9200)) for 2 hours and ABC kit for 1 hour (Vectastain ABC Kit,  
213 Vector Labs (PK-6100)). Washes with TBS-X (3 x 5 min) were performed in between each  
214 step. Staining was then visualized using DAB. Sections were then mounted onto slides, air  
215 dried, and coverslipped.

216 Slides from all three stains were then scanned with an Olympus VS120 slide scanner at  
217 x40 magnification. Images were saved with 80% compression.

218 Raw MRI data is available on OpenNeuro (doi:10.18112/openneuro.ds003463.v1.0.0).

## 219 3 Results

### 220 3.1 Mn(II) increased the SNR of MGE images

221 One aim of this study was to evaluate the efficacy of using Mn(II) as a T1 shortening agent  
222 to increase the SNR and/or decrease the scan time of high-resolution images. To this end,  
223 high-resolution MGE images were acquired both before and after MnCl<sub>2</sub> administration for  
224 six 5xFAD mice. The post-Mn SNR was on average 55% higher than the pre-Mn SNR, but  
225 the change varied greatly from 7% to 108% (**Table 2**). This variability may have been due  
226 to Mn(II)-independent variability in image quality stemming from sensitivities to shimming  
227 and motion of the long, gradient-echo-based scan.

**Table 2** Signal-to-noise ratios of MGE magnitude meanTE images

| genotype    | 5xFAD      |             |       | TgF344-AD   |             |
|-------------|------------|-------------|-------|-------------|-------------|
|             | Pre-Mn SNR | Post-Mn SNR | ratio | genotype    | Post-Mn SNR |
| TG          | 44.83      | 62.38       | 1.39  | WT          | 42.37       |
| TG          | 70.64      | 75.68       | 1.07  | WT          | 33.14       |
| TG          | 44.58      | 57.69       | 1.29  | TG          | 42.35       |
| TG          | 37.92      | 74.78       | 1.97  | TG          | 34.23       |
| TG          | 47.73      | 72.36       | 1.52  | TG          | 37.00       |
| TG          | 38.54      | 80.05       | 2.08  | TG          | 40.00       |
| <b>Mean</b> | 47.37      | 70.49       | 1.55  | <b>Mean</b> | 38.18       |
| <b>SD</b>   | 12.03      | 8.60        | 0.39  | <b>SD</b>   | 4.02        |

228

229 Beyond increasing SNR, Mn(II) increased neuroanatomical contrast, most likely due to  
230 regional differences in uptake driven by neural activity and neuronal density (**Figure 2a**).  
231 This is apparent in the increased white/gray matter contrast and particularly in the visibility  
232 of hippocampal structures. This is far from a novel observation – Mn(II) is well-known to  
233 enhance neuroanatomical contrast – but it bears mentioning for this specific application  
234 because nominally T1-weighted FLASH-like sequences like the MGE sequence used in this  
235 study produce fairly flat image contrast at high fields. Thus, MEMRI was especially  
236 beneficial and aided more precise localization of plaques.

### 237 3.2 Mn(II) had a variable effect on plaque contrast

238 While Mn(II) increased global tissue contrast and thereby improved our ability to determine  
 239 where plaques were located, it had a variable effect on our ability to detect plaques in the  
 240 first place. Hypointense plaques were visible in magnitude and SWI meanTE images  
 241 (**Figure 2a,b**) both before (left column) and after (right column) MnCl<sub>2</sub> administration. Due  
 242 to imperfect slice alignment between pre- and post-Mn scans, not all plaques visible in one  
 243 were visible in the other. For one 5xFAD mouse, eight plaques visible in both pre- and post-  
 244 Mn scans were randomly selected and manually segmented (yellow arrows, **Figure 2a,b**).  
 245 The CNR of those plaques are presented in **Figure 2e**. In the magnitude meanTE images,  
 246 the post-Mn CNR of three plaques were actually lower than the pre-Mn CNR; while in the  
 247 SWI meanTE images, the post-Mn CNR was higher in all but one plaque. As mentioned  
 248 above, the pre- and post-Mn slices were not perfectly aligned, which led to varying degrees  
 249 of partial voluming in the slice direction and may have contributed to the unexpectedly lower  
 250 post-Mn CNR of some plaques.

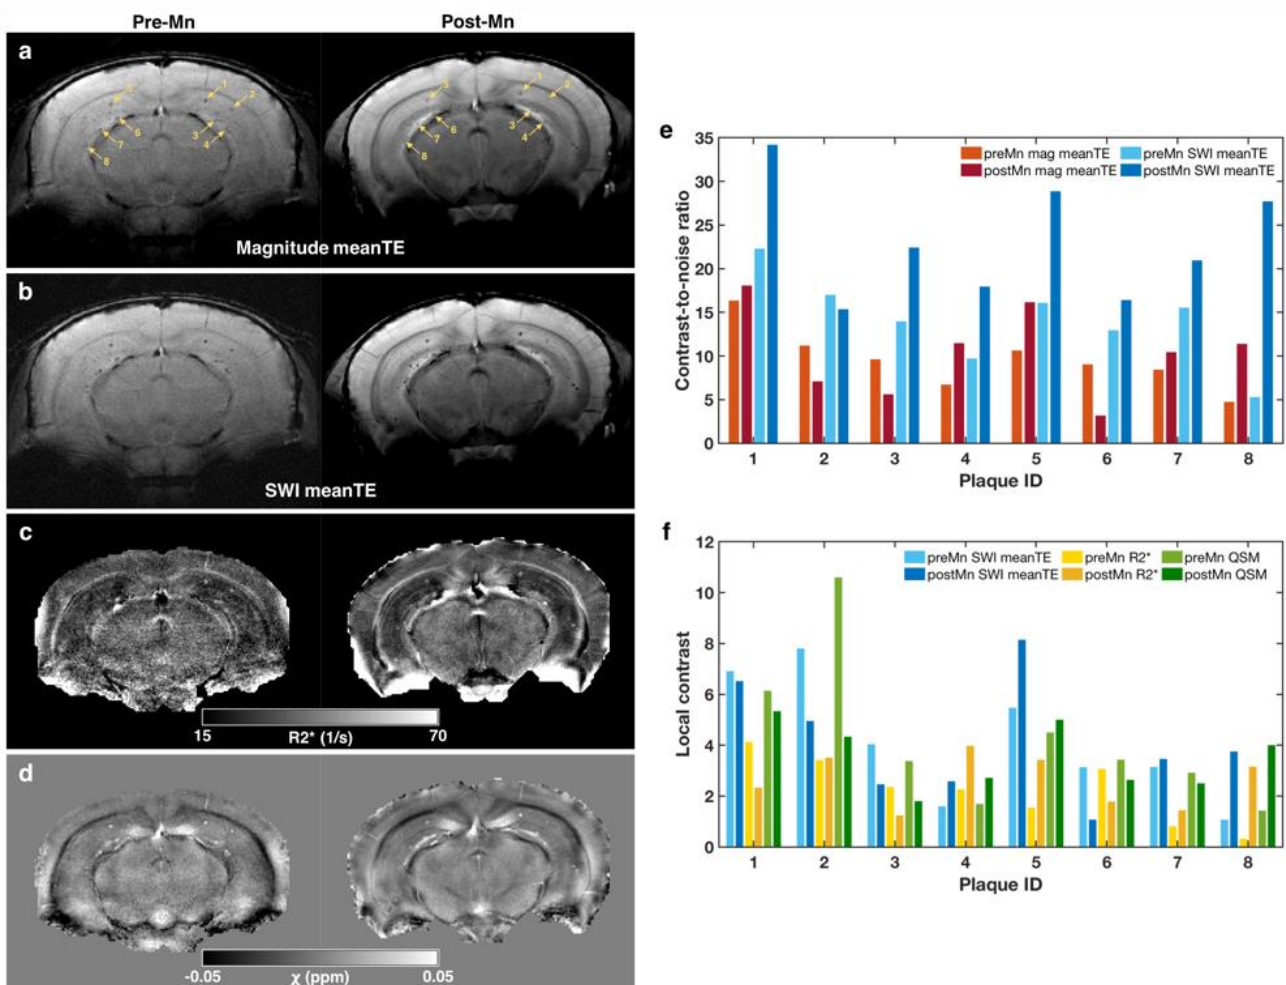

**Figure 2. 5xFAD plaque contrast in MGE-derived images and maps before and after MnCl<sub>2</sub>**

**administration.** a) Matching slices of MGE images acquired from a 5xFAD mouse before (pre-Mn) and after (post-Mn) MnCl<sub>2</sub>. The images were computed by averaging the magnitude images across all four echo times (TE = 5-26 ms). Yellow arrows point to the same eight plaques, which were manually selected for contrast analysis. b-d) The same slices as in (a) but showing: b) the susceptibility-weighted images (SWI) averaged across TE, c) the R2\* maps derived from mono-exponential fitting of the multi-echo data, and d) the magnetic susceptibility ( $\chi$ ) maps derived from quantitative susceptibility mapping (QSM). e) Contrast-to-noise ratios (CNR) of each of the eight plaques in the pre- and post-Mn magnitude meanTE (a) and SWI meanTE images (b). CNR was calculated as  $\text{abs}(\text{mean}(\text{plaque signal intensity}) - \text{mean}(\text{neighborhood signal intensity})) / \text{sd}(\text{background signal intensity})$ . f) Local contrast of each of the eight plaques in the pre- and post-Mn SWI meanTE images (b), R2\* maps (c), and QSM maps (d). Local contrast was calculated as  $\text{abs}(\text{mean}(\text{plaque signal intensity}) - \text{mean}(\text{neighborhood signal intensity})) / \text{sd}(\text{neighborhood signal intensity})$ .

251

252 **3.3 Plaque MR-visibility was driven by increased magnetic susceptibility**

253 As for the 5xFAD mouse, we manually segmented eight random plaques in one TgF344-AD  
254 rat (**Figure 3**). All selected plaques in both the 5xFAD mouse and TgF344-AD rat had  
255 higher CNR in the SWI meanTE image compared to the magnitude image (**Figure 2e** and  
256 **Figure 3e**): 5xFAD post-Mn SWI CNR =  $22.99 \pm 6.70$ , magnitude CNR =  $10.43 \pm 5.07$ ;  
257 TgF344-AD post-Mn SWI CNR =  $12.23 \pm 1.75$ , magnitude CNR =  $7.25 \pm 2.12$ . In addition,  
258 MGE-visible plaques had elevated R2\* (**Figure 2c** and **Figure 3c**), which increases in the  
259 presence of magnetic susceptibility gradients. QSM confirmed that the plaques had a  
260 positive magnetic susceptibility greater than most of the surrounding brain parenchyma  
261 (**Figure 2d** and **Figure 3d**). Comparing the three image modalities – SWI, R2\*, and QSM –  
262 the post-Mn local plaque contrast was generally highest in the SWI meanTE images  
263 (5xFAD:  $4.12 \pm 2.32$ , TgF344-AD:  $4.51 \pm 1.14$ ), intermediate in the QSM maps (5xFAD:  
264  $3.54 \pm 1.30$ , TgF344-AD:  $2.90 \pm 1.15$ ), and lowest in the R2\* maps (5xFAD:  $2.61 \pm 1.04$ ,  
265 TgF344-AD:  $2.40 \pm 0.71$ ). However, the relative local contrasts of the three modalities  
266 varied from plaque to plaque (**Figure 2f** and **Figure 3f**).

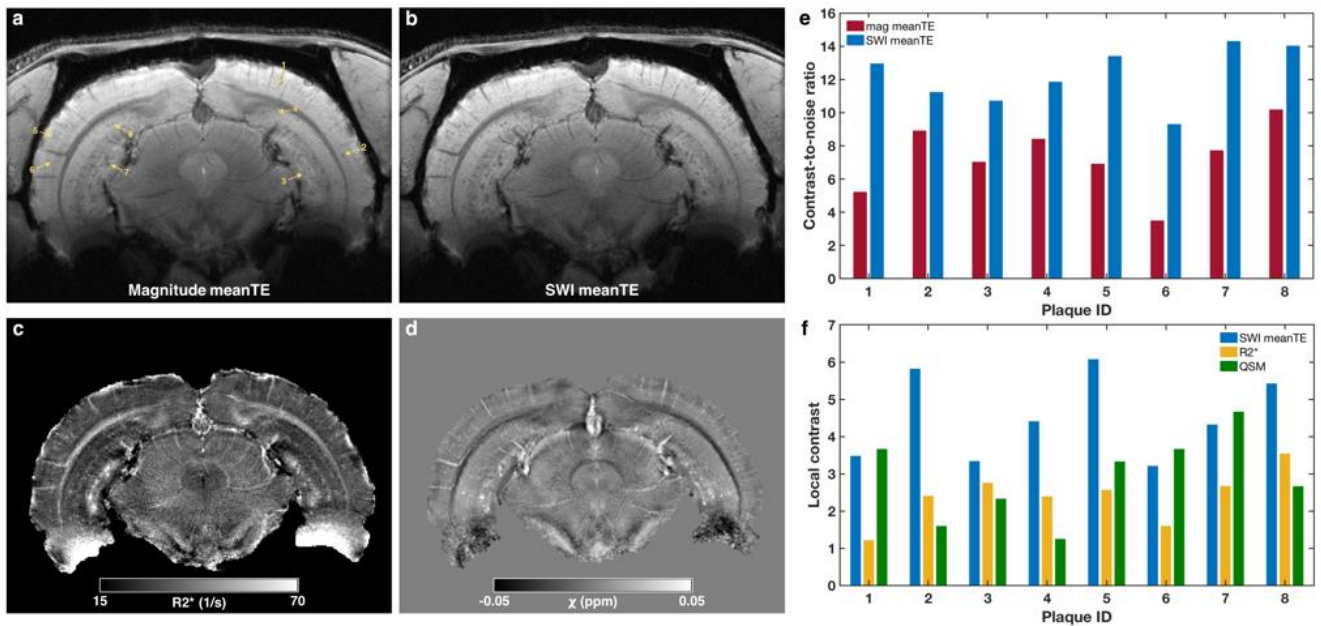

### 267 3.4 Only a fraction of histologically identified plaques were MR-visible

268 **Figure 4** and **Figure 5** show single slices of SWI meanTE images of each mouse and rat  
 269 brain, respectively, for which MGE scans were acquired. Most visible plaques in 5xFAD  
 270 mouse brains were in the hippocampus, while more plaques in TgF344-AD rat brains were  
 271 visible in the cortex as well as the hippocampus. As expected, there were no visible plaques  
 272 in any of the wild-type animals. Half of the 5xFAD mice presented with bilateral hypointense  
 273 clusters in the thalamus, which were also not found in wild-type animals.

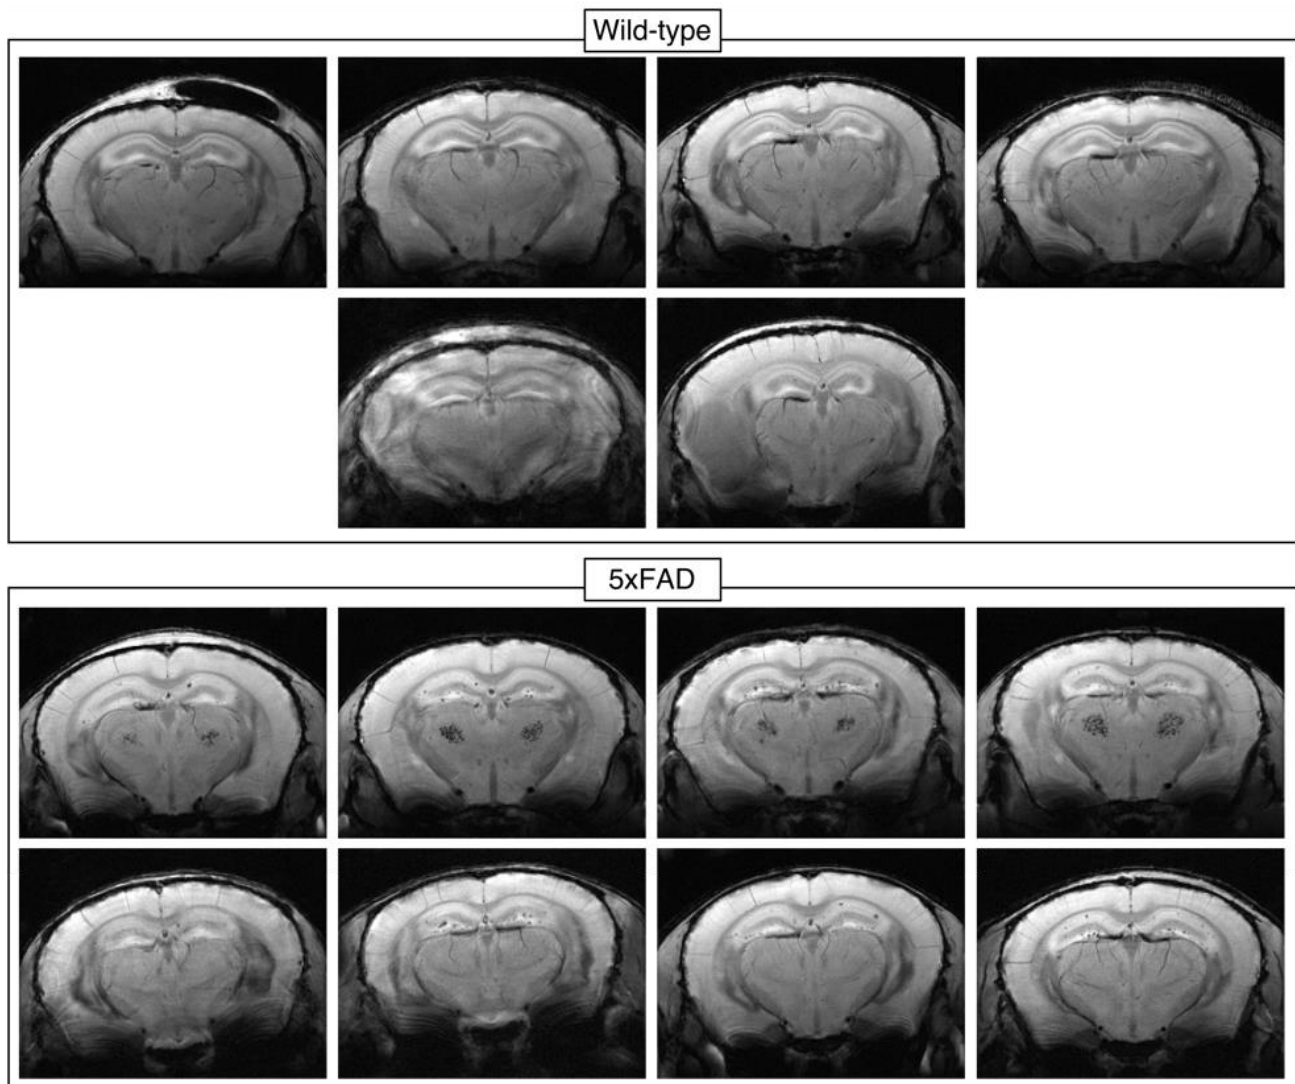

**Figure 4. Plaques visible in the hippocampus of all 5xFAD mice.** Single slices from MGE susceptibility-weighted meanTE images of all wild-type mice (one had severe Moiré fringe artifacts [second row, left], and one mouse had hydrocephalus [second row, right]) and all 5xFAD mice. Very few plaques were visible in one 5xFAD mouse due to Moiré fringe artifacts (bottom left). Half of the 5xFAD mice presented with bilateral hypointense clusters in the thalamus (third row) not found in wild-type littermates.



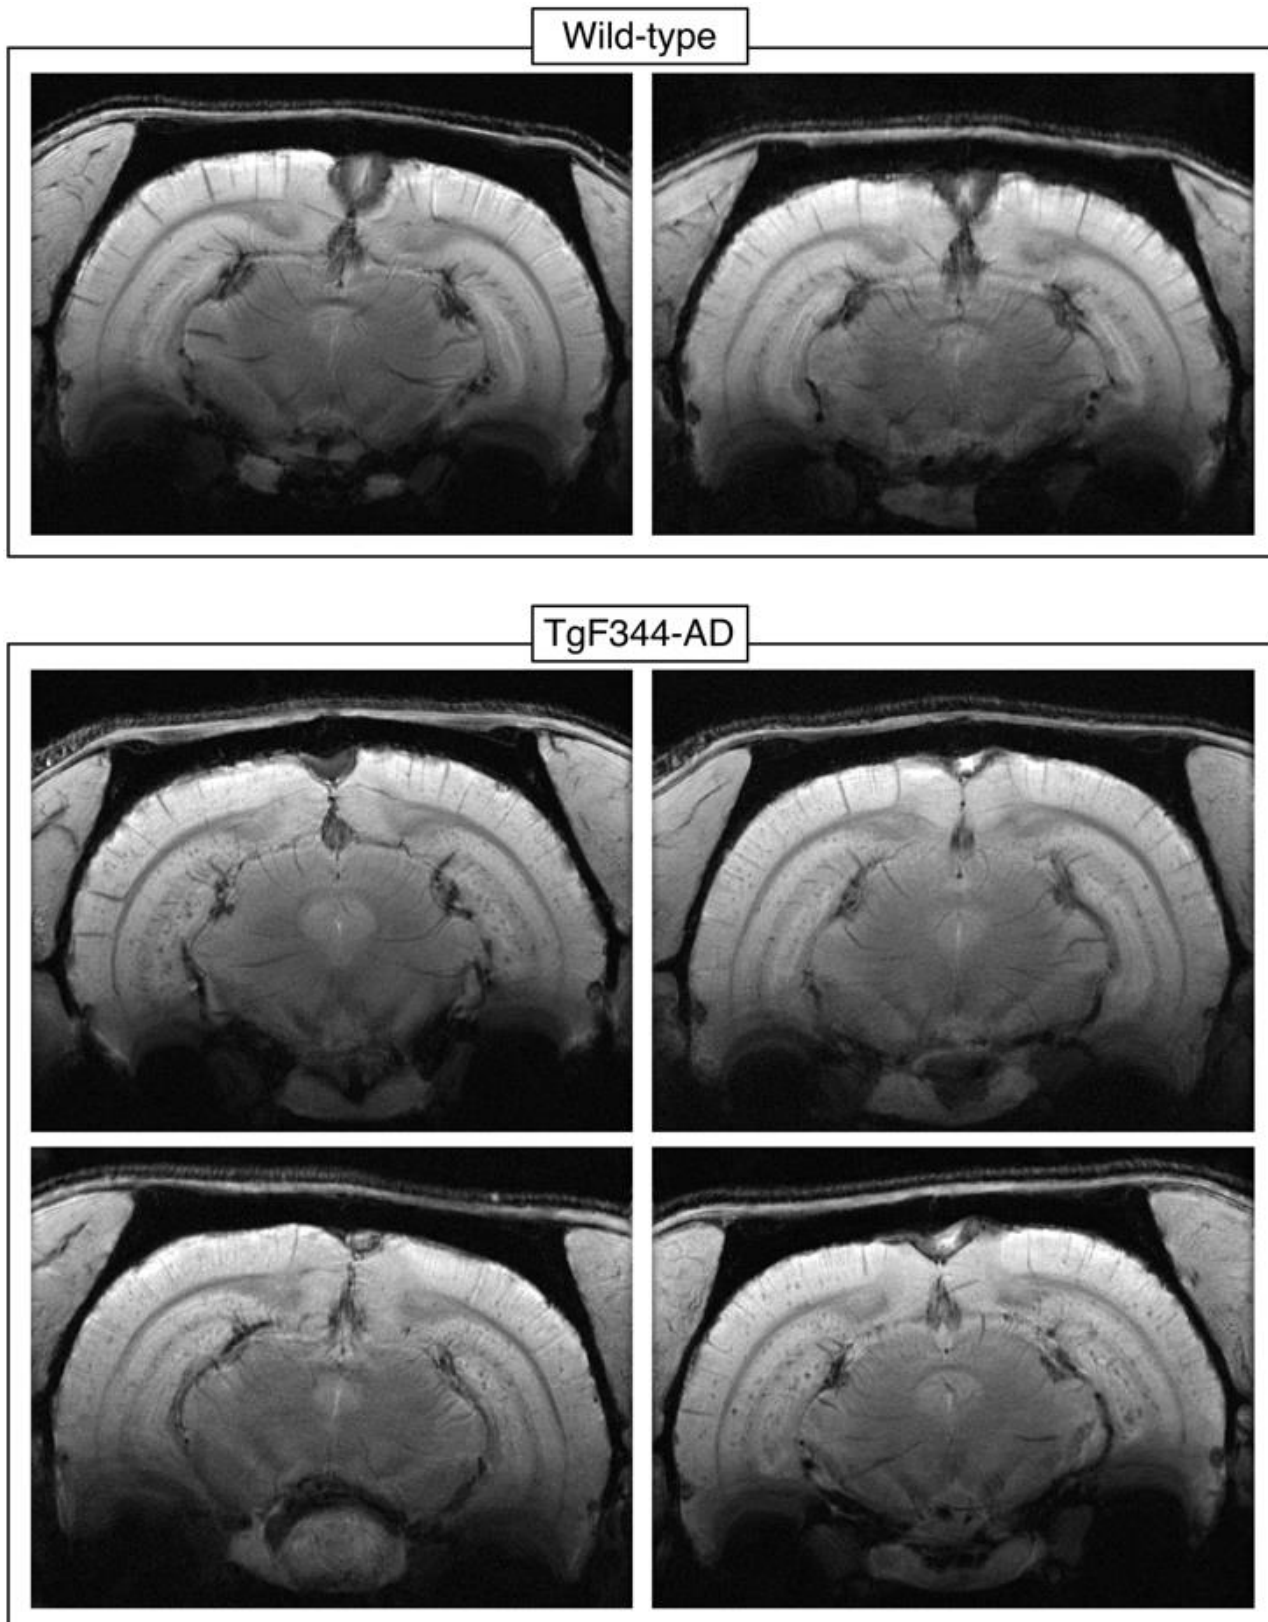

**Figure 5. Plaques visible in the cortex and hippocampus of all TgF344-AD rats.** Single slices from MGE susceptibility-weighted meanTE images of all wild-type rats and all TgF344-AD rats. Compared to the 5xFAD mice, the TgF344-AD plaques had lower contrast and were more obscured by blood vessels; still many more plaques were visible, especially in the cortex and ventral hippocampus.

275 4G8 anti-A $\beta$  staining revealed senile plaques throughout the 5xFAD brain, with large plaque  
276 burdens in the septum, thalamus, and deeper cortical layers in addition to the hippocampus  
277 (**Figure 6a**). Perl's/DAB staining showed that iron was present in many plaques in the  
278 cortex, hippocampus, and thalamus; but interestingly, very few plaques outside the  
279 hippocampus were visible in MGE images (**Figure 6b-d**).

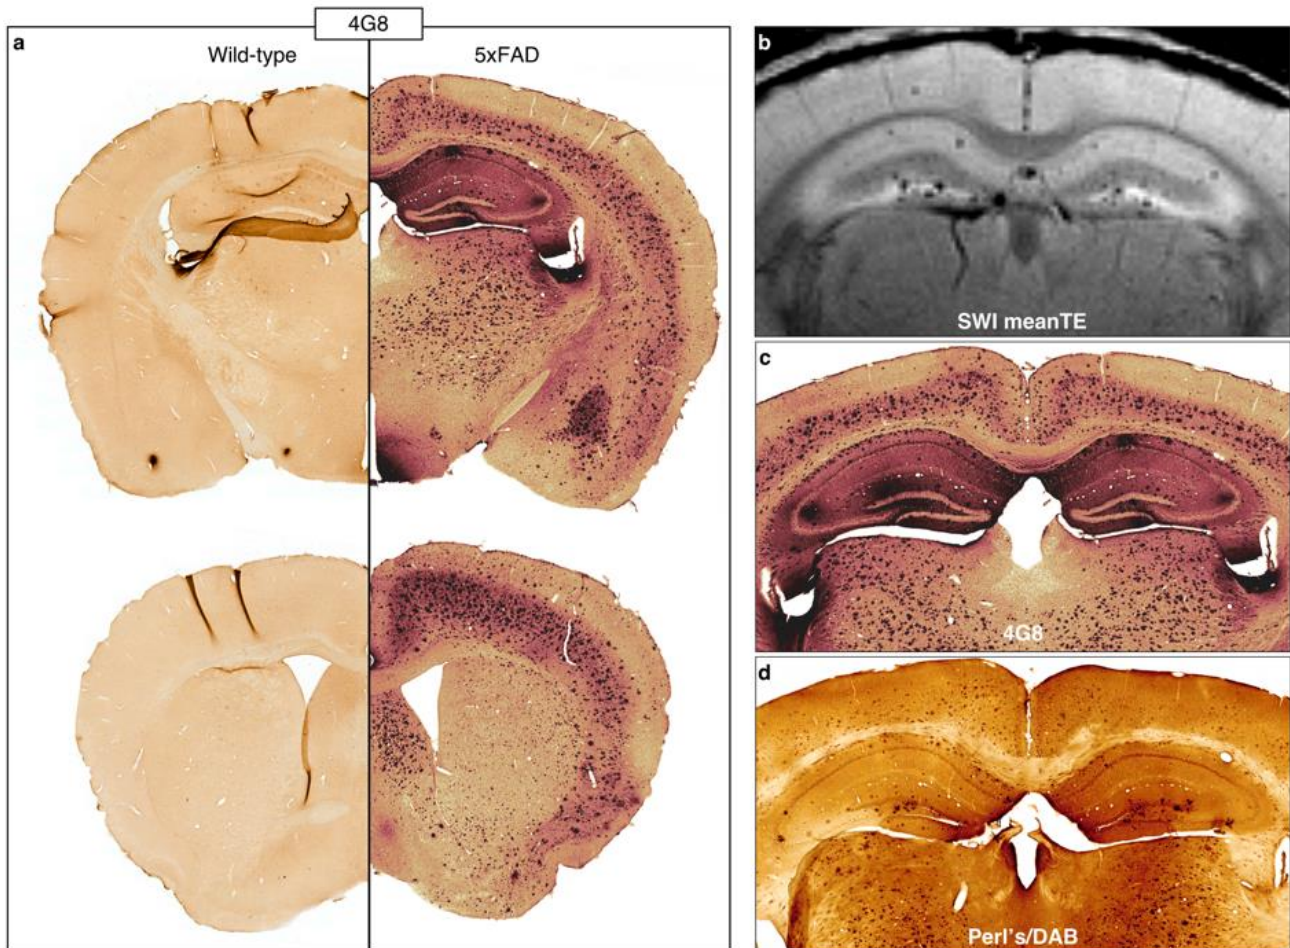

**Figure 6. Histology shows iron-containing A $\beta$  plaques throughout the brain in 5xFAD mice.** a) 4G8 anti-amyloid staining confirmed the presence of plaques not only in the hippocampus, but in the deep cortical layers and subcortical regions, including the thalamus, of 5xFAD mice. b) The plaques visible on MRI were mostly limited to the hippocampus, with a few cortical plaques visible in a few mice. The contrast in these MGE images is largely T2\*/susceptibility-driven. Perl's-DAB staining showed that many of the plaques stained with 4G8 contained iron (c-d). Thus, iron load did not appear to play a large role in plaque MRI-visibility. Images in b-c were acquired from the same 5xFAD mouse.

280 The thalamic plaques in the 4G8- and Perl's/DAB-stained sections (**Figure 6**) were not  
281 localized in the manner of the hypointense clusters seen in the MR images (**Figure 4**).  
282 QSM revealed that these clusters were diamagnetic at baseline (pre-Mn, **Figure 7a**) but  
283 became paramagnetic after MnCl<sub>2</sub> administration (post-Mn, **Figure 7b**). Alizarin Red

284 staining showed large spots in the same area of the thalamus (**Figure 7c**); these large  
285 spots were only present in mice with MR-visible thalamic clusters (**Figure 7d**).

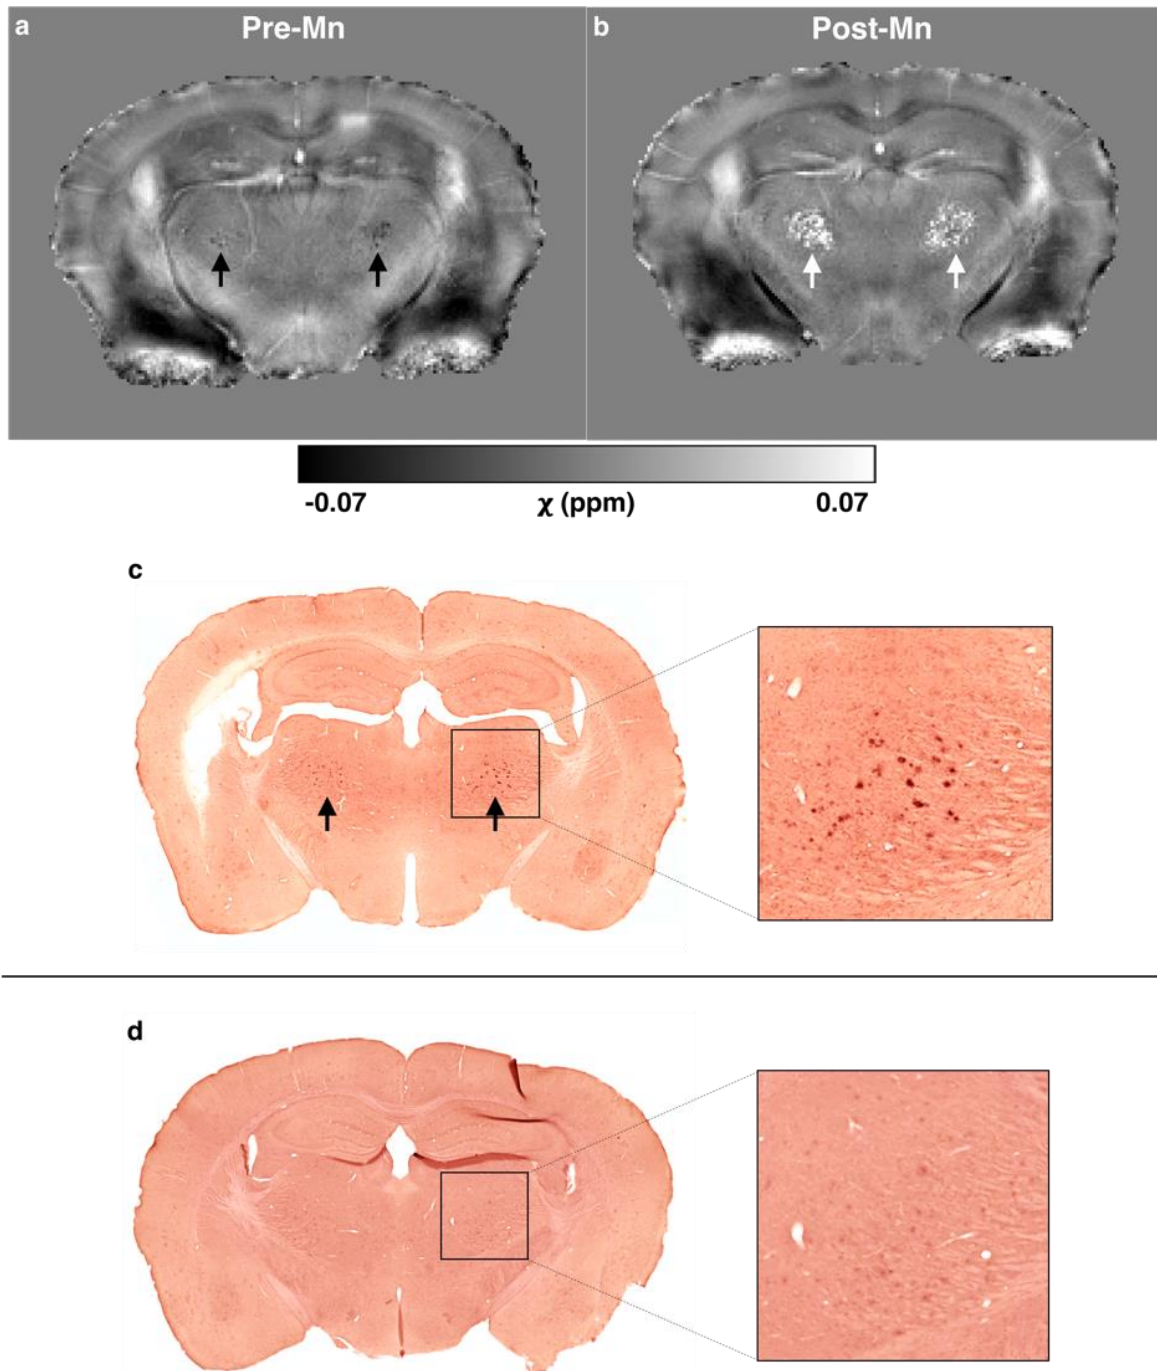

**Figure 7. *In vivo* QSM and Alizarin Red staining reveal thalamic calcifications in 5xFAD mice.** a-b) Quantitative susceptibility ( $\chi$ ) maps of a 5xFAD mouse a) before (pre-Mn) and b) after administration of MnCl<sub>2</sub> (Post-Mn). Bilateral clusters in the thalamus were diamagnetic Pre-Mn but became paramagnetic Post-Mn (arrows). c) A section from the same mouse, stained with Alizarin Red, shows that these thalamic clusters contain calcium and/or manganese. d) An Alizarin-Red-stained section from a 5xFAD mouse without MR-visible thalamic clusters.

286 Alizarin Red staining also revealed numerous, less intensely stained foci in the brains of  
287 5xFAD mice treated with  $MnCl_2$  (Mn+) that were not present in Mn+ wild-type brains  
288 (**Figures 7 and 8**). Fewer of these deposits were visible in the  $MnCl_2$ -naïve (Mn-) 5xFAD  
289 brain, while the Mn- and Mn+ wild-type brain sections had a similar appearance. The  
290 Alizarin-Red-stained deposits in the Mn+ 5xFAD sections matched the spatial distribution of  
291 4G8-stained  $A\beta$  plaques (**Figure 6a**), suggesting that the injected Mn(II) bound to the  
292 plaques.

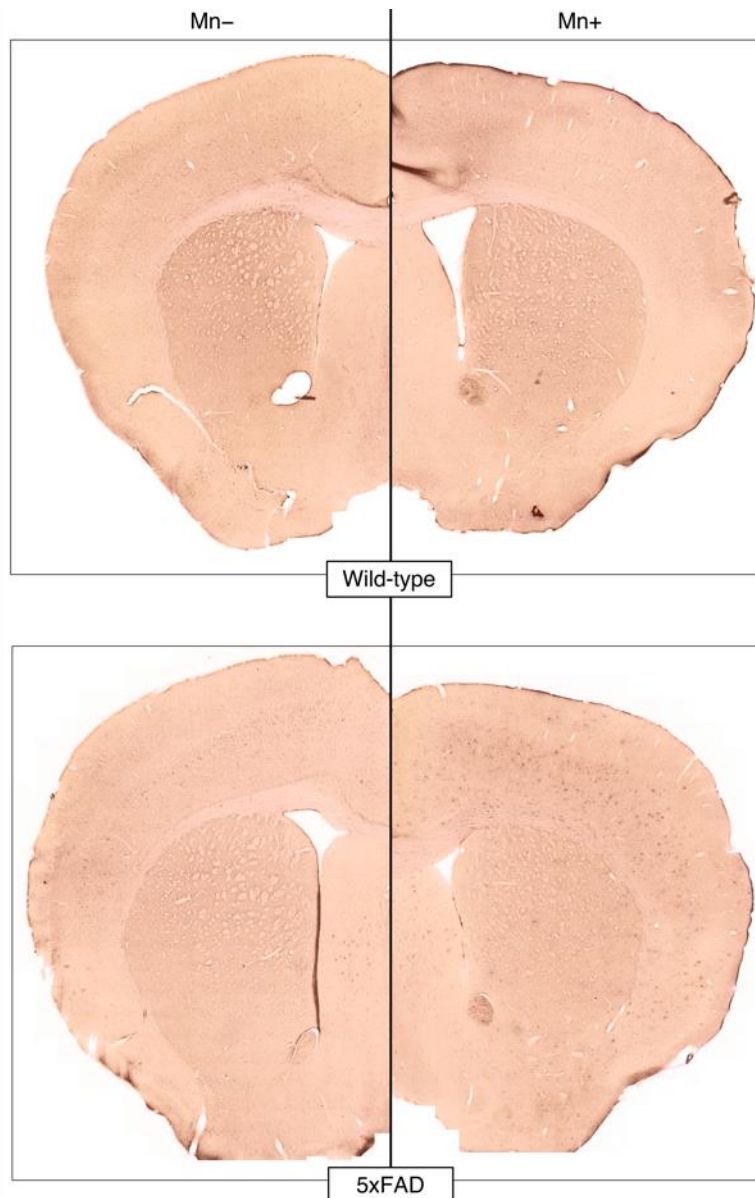

**Figure 8. Alizarin Red staining shows subcutaneously administered manganese binds to  $A\beta$  plaques in the 5xFAD brain.** Alizarin Red binds to calcium and, because of their chemical similarity, manganese. Alizarin Red staining appears similar in wild-type brains that were  $MnCl_2$ -naïve (Mn-) and treated with  $MnCl_2$  (Mn+). In the Mn- 5xFAD brain, some plaques or plaque-like structures in the cortex and septum were

stained. Many more plaques were stained in the Mn+ 5xFAD brain, suggesting that the injected manganese bound to the plaques.

293 Unlike in the 5xFAD brains, Alizarin Red staining showed no evidence of Mn(II) binding to  
294 plaques in the TgF344-AD brains (**Figure 9**).

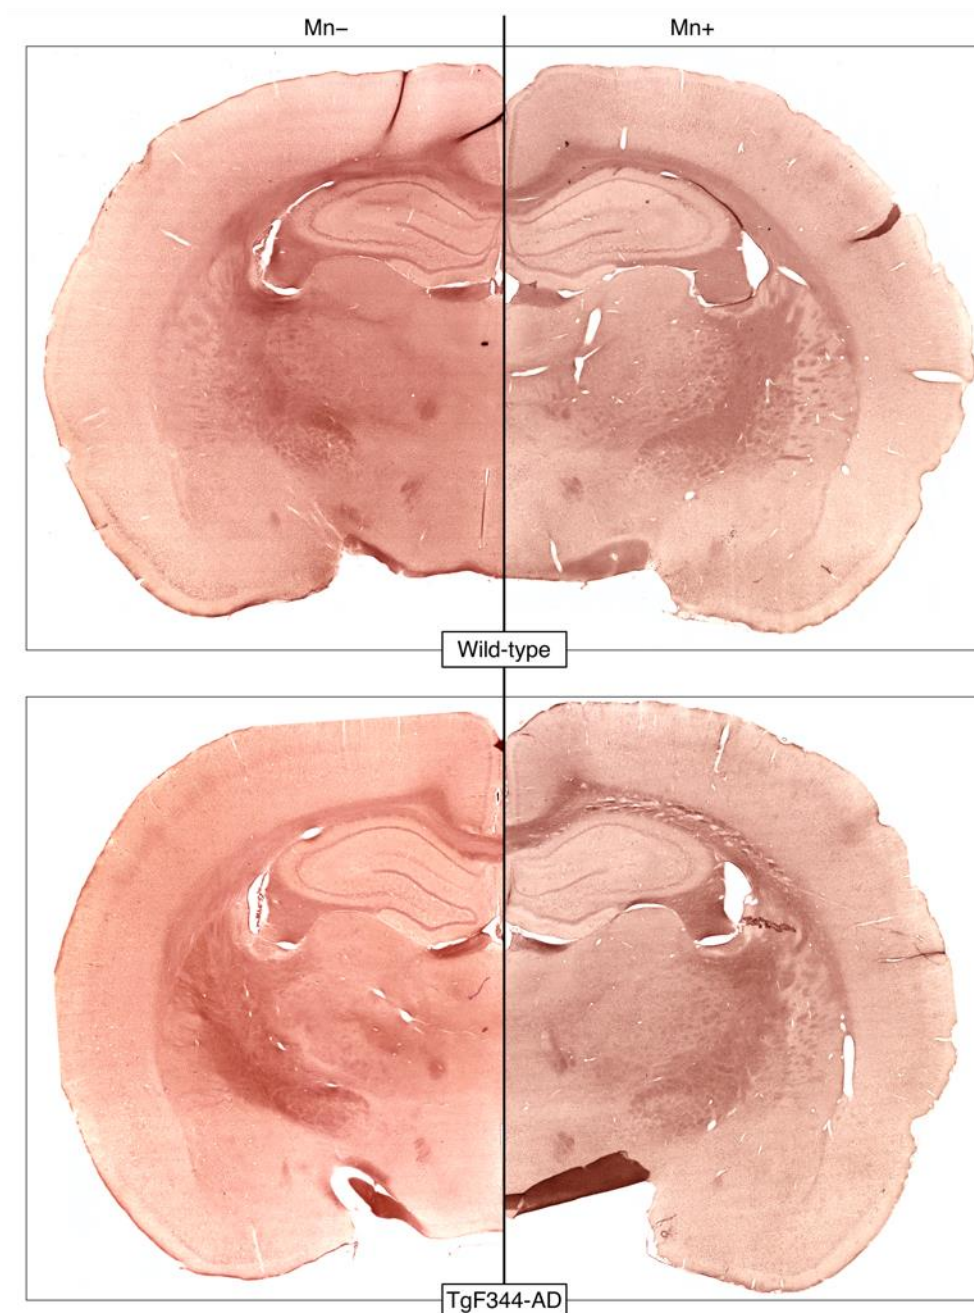

**Figure 9. Alizarin Red staining reveals little difference between wild-type and TgF344-AD rat brains.**

Alizarin Red binds to calcium and, because of their chemical similarity, manganese. Alizarin Red staining appears similar in wild-type and TgF344-AD brains that were manganese-naïve (Mn-) and treated with MnCl<sub>2</sub> (Mn+). Unlike in the 5xFAD mouse brains, there is no evidence that exogenously administered manganese bound to senile plaques in TgF344-AD rat brains.

295 Compared to 5xFAD mice, TgF344-AD rats had a lower plaque burden in general except in  
296 the hippocampus, amygdala, and piriform cortex (**Figure 10a**). Most plaques throughout the  
297 rat brain appeared to contain iron deposits (**Figure 10c**). The 4G8 and Perl's/DAB staining  
298 revealed no obvious difference between plaques in the dorsal hippocampus versus those in  
299 the ventral hippocampus, but more plaques were MR-visible in the latter than in the former  
300 (**Figure 10b**). Plaques in the amygdalopiriform cortex were difficult to see in the MR images  
301 due to a combination of the receiver coil's inhomogeneous sensitivity profile and the signal  
302 dropout around the air-tissue interfaces along the ventral surface of the brain.

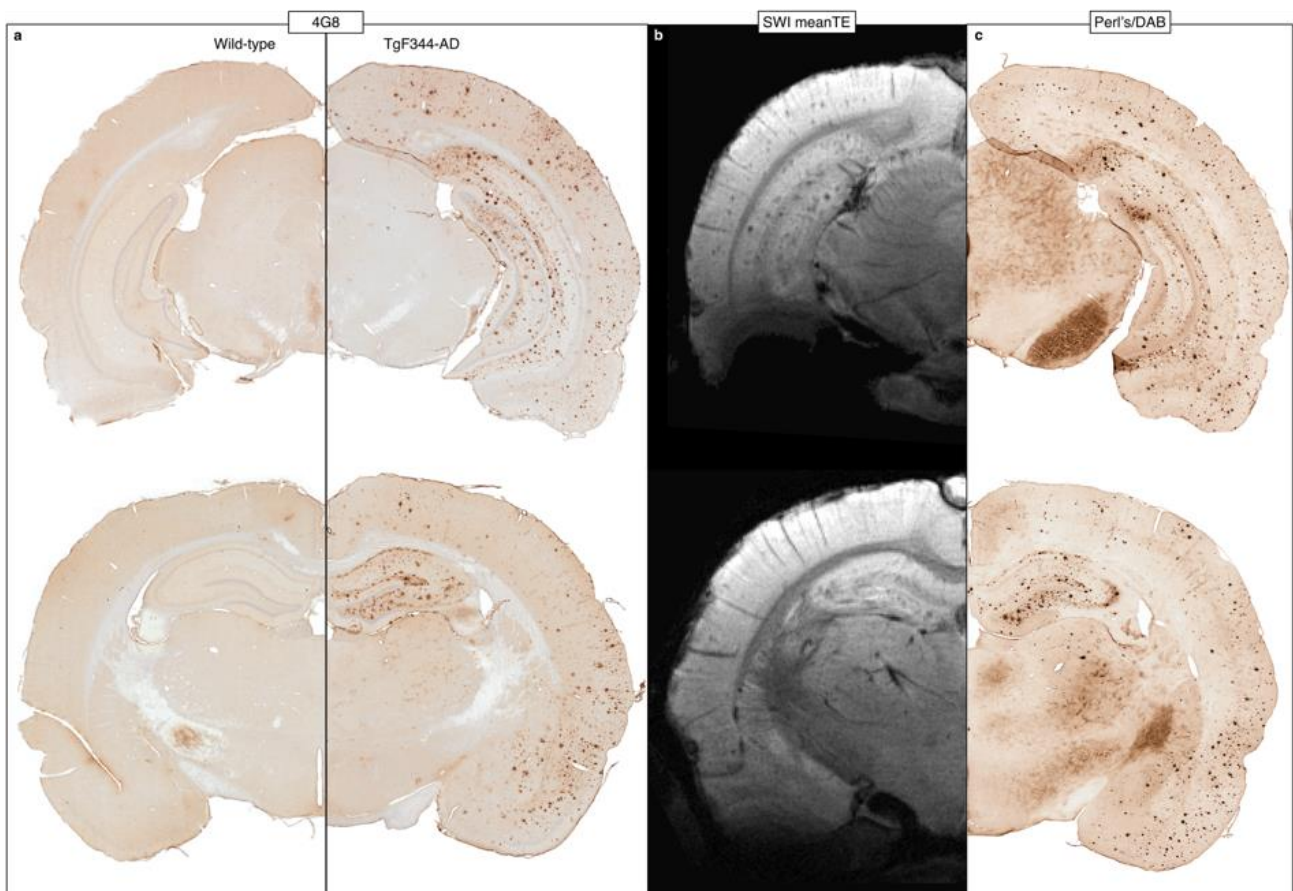

**Figure 10. Histology shows iron-containing A $\beta$  plaques throughout the brain in TgF344-AD rats.** a) 4G8 anti-amyloid staining confirmed the presence of plaques throughout the hippocampus and cortex of TgF344-AD rats. b) Hippocampal and cortical plaques were visible on MRI. Susceptibility artifacts around the air-tissue interfaces at the ventral surface of the brain obscured visualization of plaques in those areas. c) Perl's-DAB staining showed a spatial distribution of iron very similar to A $\beta$ . All images were acquired from one wild-type (a - left) and one TgF344-AD rat (a - right, b, c).

### 303 3.5 Mn(II) uptake was increased in areas of high plaque burden

304 The MP2RAGE data revealed a trend ( $0.22 < \text{FWE-corrected } p < 0.5$ ) towards increased  
305  $R_{1\text{norm}}$  in 5xFAD compared to WT mice in several brain regions including the deep cortical  
306 layers, hippocampus, thalamus, and septum (**Figure 11a,b**). The spatial pattern of  
307 increased  $R_{1\text{norm}}$  is consistent with the histologically verified pattern of  $A\beta$  deposition  
308 (**Figure 6a**). This is consistent with the apparent binding of Mn(II) to senile plaques  
309 (**Figures 7 and 8**). To illustrate the magnitude of the genotype-driven difference in  $R_{1\text{norm}}$ ,  
310 an ROI in the anterior cortex was automatically generated by thresholding the voxel-wise  
311 statistical map at FWE-corrected  $p < 0.3$  and taking the largest connected component  
312 (**Figure 11c**), and the mean  $R_{1\text{norm}}$  within the ROI was plotted for each mouse (**Figure**  
313 **11d**). The mean  $R_{1\text{norm}}$  was significantly greater in 5xFAD mice compared to wild-types  
314 (two-sample t-test  $p = 0.028$ , Cohen's  $d = 1.44$ ).

315  $R_{1\text{norm}}$  was also increased in TgF344-AD rats compared to their wild-type littermates but in  
316 different areas of the brain than in 5xFAD mice – mostly in the rhinencephalon including the  
317 olfactory bulb, amygdala, and piriform cortex (**Figure 12a,b**). Also unlike the 5xFAD mice,  
318 the increase in  $R_{1\text{norm}}$  was statistically significant (FWE-corrected  $p < 0.05$ ) in sizeable  
319 clusters (black contours, **Figure 12a,b**). A rhinencephalon ROI was automatically  
320 segmented by taking the largest connected component of the  $R_{1\text{norm}}$  p-value map after  
321 thresholding it at FWE-corrected  $p < 0.05$  (**Figure 12c**). The mean  $R_{1\text{norm}}$  in the ROI was  
322 significantly greater in TgF344-AD rats than in wild-types (two-sample t-test  $p < 0.00001$ ,  
323 Cohen's  $d = 12.93$ , **Figure 12d**).

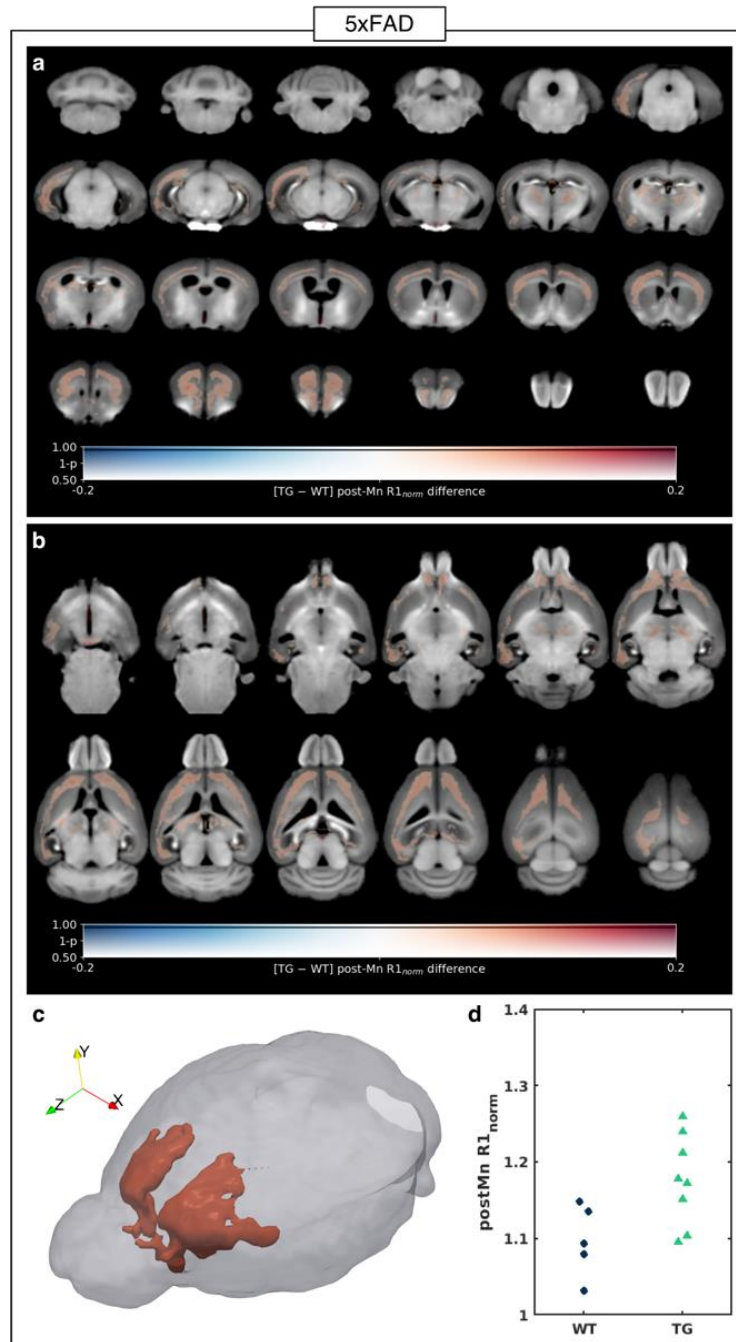

**Figure 11. 5xFAD mice show increased manganese uptake in the deeper layers of the cortex.** a-b) The voxel-wise difference in post-Mn  $R1_{norm}$  ( $R1$  values were normalized to the median  $R1$  in a manually defined region in the temporalis muscle) between 5xFAD (TG,  $n=8$ ) mice and wild-type (WT,  $n=5$ ) littermates, overlaid on the T1-weighted MP2RAGE study-specific template shown in a) coronal slices from back to front and b) transverse slices from bottom to top. The difference in group means is coded by overlay color (warm colors indicate TG > WT), and the statistical significance is coded by overlay transparency (completely transparent indicates family-wise-error-corrected  $p > 0.5$ ). c) 3D rendering of the template brain (gray) and a cortical region of interest (ROI) automatically generated from the largest connected component in which  $p < 0.3$  (red). d) A dot plot of the mean post-Mn  $R1_{norm}$  within the ROI for each mouse. Two-tailed two-sample t-test,  $p = 0.028$ .



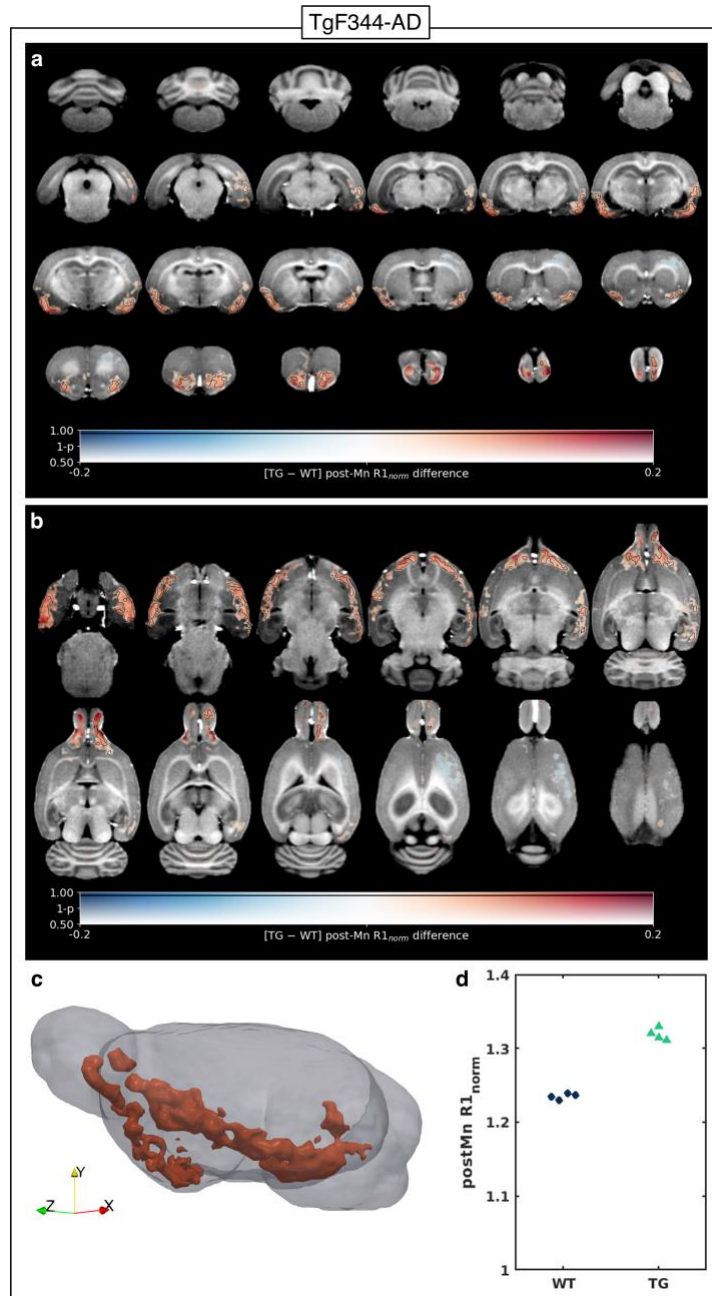

**Figure 12. TgF344-AD rats show increased manganese uptake in the rhinencephalon.** a-b) The voxel-wise difference in post-Mn  $R1_{norm}$  ( $R1$  values were normalized to the median  $R1$  in a manually defined region in the temporalis muscle) between TgF344-AD (TG,  $n=4$ ) rats and wild-type (WT,  $n=4$ ) littermates, overlaid on the pre-Mn T1-weighted MP2RAGE study-specific template shown in a) coronal slices from back to front and b) transverse slices from bottom to top. The difference in group means is coded by overlay color (warm colors indicate TG > WT), and the statistical significance is coded by overlay transparency (completely transparent indicates family-wise-error-corrected  $p > 0.5$ ). Areas in which  $p < 0.05$  are outlined in black. c) 3D rendering of the template brain (gray) and a region of interest (ROI) in the rhinencephalon automatically generated from the largest connected component in which  $p < 0.05$  (red). d) A dot plot of the mean post-Mn  $R1_{norm}$  within the rhinencephalon ROI for each rat. Two-tailed two-sample t-test,  $p < 0.00001$ .

## 324 4 Discussion

### 325 4.1 MnCl<sub>2</sub> as a GBCA alternative

326 The original aim of this study was to evaluate the suitability of MnCl<sub>2</sub> as an easily  
327 deliverable alternative to GBCAs to aid direct visualization of senile plaques in high-  
328 resolution MR images. While Mn(II) boosted SNR and tissue contrast, it did not appreciably  
329 enhance plaque visibility in 5xFAD mice (**Figure 2**). However, given that the SNR of the  
330 pre-Mn images was sufficient to visualize plaques, the signal enhancement provided by  
331 Mn(II) could be leveraged to increase the image resolution and/or shorten the scan time  
332 while maintaining the ability to detect plaques.

333 Compared to studies that used GBCAs, we achieved less signal enhancement with MnCl<sub>2</sub>.  
334 For example, Santin et al. delivered Gd-DOTA to the brain parenchyma in mice using  
335 microbubbles and ultrasound to transiently open the blood-brain barrier, which reduced the  
336 cortical T1 from ~2000 ms to ~360 ms at 7T (Santin et al., 2013). This dramatic T1  
337 shortening allowed them to acquire images with a resolution of 29×29×117 μm<sup>3</sup> (~9× higher  
338 than our MGE images) in just 32 minutes. In comparison, we measured a much smaller  
339 decrease in whole-brain T1 from ~1600 ms to ~1300 ms at 9.4T after MnCl<sub>2</sub> injections in  
340 the rats. This large difference in T1 shortening is due to the much higher Gd-DOTA dose  
341 compared to the MnCl<sub>2</sub> dose given to the rats (4 mmol/kg vs. 0.3 mmol/kg). The toxicity of  
342 free manganese prevents the use of such high doses of MnCl<sub>2</sub>, which therefore cannot  
343 enable a comparable combination of high resolution and short scan time. Nevertheless, the  
344 ease of MnCl<sub>2</sub> administration by simple subcutaneous injections, compared to complex  
345 delivery required for GBCAs is advantageous for many non-invasive applications.

### 346 4.2 Discrepancy between MRI and histology

347 There was a discrepancy between the spatial distributions of MR-visible plaques in MGE  
348 images and iron-loaded plaques on histological sections. Perl's staining with potassium  
349 ferrocyanide specifically stains Fe(III), but the additional DAB intensification step results in  
350 staining of both Fe(III) and Fe(II) (Roschztardt et al., 2009). A recent phantom study found  
351 that Fe(III) and Fe(II) have significantly different r<sub>2</sub><sup>\*</sup> relaxivities: 12.5 mM<sup>-1</sup>s<sup>-1</sup> and 0.77 mM<sup>-1</sup>  
352 s<sup>-1</sup>, respectively (O. Dietrich et al., 2017).

353 A $\beta$ , like most proteins, is diamagnetic. Putative A $\beta$  plaques have been shown to appear as  
354 diamagnetic spots in *ex vivo* QSM of transgenic A $\beta$  mice (Gong et al., 2019). However,  
355 many of the plaques in the animal models used in this study appear to contain iron, and the  
356 MR-visible plaques have positive susceptibilities. Co-localization of paramagnetic iron with  
357 diamagnetic A $\beta$  may reduce susceptibility-based MR contrast.

358 While Perl's/DAB staining revealed the presence of plaque-associated iron throughout the  
359 brain, regional variation in plaque configuration (compact vs. diffuse) (Dudeffant et al.,  
360 2017), relative concentrations of A $\beta$  and iron, and different species of iron might explain  
361 why certain plaques were not visible in the MGE images. More nuanced and quantitative  
362 molecular analysis is required to test these hypotheses.

363 Given the relatively large voxel dimensions, the size of the iron core might be the most  
364 important determinant of MR visibility, especially in these T2\*-weighted MGE images. 4G8  
365 staining shows that plaque sizes do not differ much between the cortex, hippocampus, and  
366 thalamus in the 5xFAD mouse (**Figure 6a,c**). In contrast, Perl's/DAB staining shows that  
367 the hippocampus contains several iron cores that are much larger than most in the cortex  
368 (**Figure 6d**). This could explain why, although there are many more plaques in the cortex,  
369 most of the MR-visible plaques are in the hippocampus (**Figure 6b**).

370 In addition, more plaques were MR-visible in TgF344-AD rats than in 5xFAD mice,  
371 supporting the hypothesis that size was the key factor underlying plaque visibility in our  
372 MGE images. Qualitatively comparing the two models, plaque size seems to scale  
373 proportionally with brain size; and in the TgF344-AD rat, there is no obvious difference in  
374 the A $\beta$  to iron ratio within plaques in the cortex compared to those in the hippocampus  
375 (**Figures 6 and 10**).

### 376 4.3 Mn(II) uptake as an indirect marker of senile plaque burden

377 While MnCl<sub>2</sub> cannot enable the kind of high-resolution imaging possible with GBCAs,  
378 MEMRI did serve another purpose in revealing regional increased Mn(II) uptake and  
379 retention in transgenic AD animals compared to wild-types. Previous MEMRI studies have  
380 also reported increased Mn(II) in AD mouse models including the 5xFAD model used here,  
381 attributing it to neuronal dysfunction and hyperactivity (Fontaine et al., 2017; Tang et al.,  
382 2016). This is consistent with the results of Busche et al. who, through *in vivo*  
383 measurements of spontaneous Ca<sup>2+</sup> transients in individual neurons, found hyperactive

384 cortical neurons in the close vicinity (within 60  $\mu\text{m}$ ) of A $\beta$  plaques in the APP23xPS45  
385 mouse model of AD (Busche et al., 2008).

386 We present evidence of another potential mechanism by which Mn(II) retention was  
387 enhanced in 5xFAD mice. The increased  $R1_{\text{norm}}$  in brain regions of high plaque load, in  
388 conjunction with Alizarin Red staining of plaques in Mn+ but not Mn- 5xFAD mice (**Figure**  
389 **8**), suggests that accumulation of the injected Mn(II) in these regions was increased by  
390 direct binding of Mn(II) to plaques. This is supported by recent studies that showed that  
391 Mn(II) binds to A $\beta$  with a weak binding affinity that does not affect the protein's aggregation  
392 (Lermyte et al., 2019; Wallin et al., 2016).

393 However, Alizarin Red staining of the TgF344-AD rats brains showed that Mn(II) does not  
394 have the same affinity to all plaques (**Figure 9**). Moreover, while the plaque load in TgF344-  
395 AD rats was equally high in the hippocampus, the increased  $R1_{\text{norm}}$  was localized to the  
396 rhinencephalon. Together, these results indicate that Mn(II) accumulation was increased in  
397 the TgF344-AD rat rhinencephalon due to neuronal dysfunction rather than Mn(II) binding to  
398 A $\beta$ .

#### 399 4.4 Thalamic calcifications in 5xFAD mice

400 In addition to senile plaque-like structures in the hippocampal and cortical areas, we also  
401 detected large clusters of hypointensities in MGE images in 4/8 5xFAD mice in their  
402 bilateral mediodorsal thalami. Similar thalamic lesions have been reported before in  
403 transgenic AD mice (Dhenain et al., 2009; Jack et al., 2004), and it has been suggested  
404 that these are not typical amyloid plaques, but instead deposits of calcium together with a  
405 variable amount of colocalized iron. Accordingly, while we observed a matching pattern  
406 between amyloid (4G8) and iron (Perl's) staining and our MRI-visible plaques in the  
407 hippocampus and cortex, neither stain resembled the configuration of the thalamic lesions  
408 which were only replicated by the staining for calcium with Alizarin Red (Dahl, 1952). QSM  
409 showed that, at pre-Mn baseline, these thalamic clusters were diamagnetic, corroborating  
410 the histological findings that these lesions are calcifications.

411 Interestingly, strikingly similar thalamic calcifications have been observed in animal models  
412 of neurotoxicity (Aggarwal et al., 2018; Mori et al., 2000), ischemia/hypoxia (Wideroe et al.,  
413 2011), depletion of huntingtin protein (P. Dietrich et al., 2017), tauopathy (Ni et al., 2019),  
414 and even ageing (Fraser, 1968). Such dystrophic calcifications (intra or extra-cellular  
415 deposits of calcium salts in degenerating or necrotic tissue) are known to occur

416 intracerebrally in the basal ganglia and thalami in a spectrum of human disorders known as  
417 primary familial brain calcification (Lemos et al., 2013). A common mechanism that appears  
418 to feature in all these calcifications is a disturbed iron homeostasis, as dysregulation of  
419 brain transferrin and ferritin has been shown to precede the calcifications. Iron is also  
420 known to be pathologically linked to AD and could play a role in the formation of thalamic  
421 calcifications in 5xFAD mice.

422 The regional location of these calcifications could be due to the same reason why  
423 calcifications target thalami in the neurotoxicity models; it is possible that an unknown factor  
424 related to, e.g., thalamic configuration or accessibility renders it particularly vulnerable. The  
425 same could underlie our observation that Mn(II) also appeared to bind to these thalamic  
426 deposits, turning them from diamagnetic at pre-Mn baseline to paramagnetic after MnCl<sub>2</sub>  
427 injection (**Figure 7**). This is supported by observations of Mn(II) binding to thalamic  
428 calcifications in a MEMRI study of hypoxia induced brain injury (Wideroe et al., 2011), as  
429 well as of its binding directly to amyloid plaques (Lermyte et al., 2019; Wallin et al., 2016).  
430 Nevertheless, while the observation of Mn-enhancing thalamic calcifications in experimental  
431 AD is interesting, the question remains about their wider significance and whether they may  
432 be useful biomarkers of either disease progression or treatment efficacy.

#### 433 4.5 Translational outlook

434 A recent study of MEMRI on healthy volunteers using the FDA-approved, but no longer  
435 marketed, mangafodipir demonstrated signal intensity increase in the choroid plexus and  
436 anterior pituitary gland but no signal enhancement in the brain parenchyma. This is likely  
437 due to the much lower dose (5 μmol/kg) compared to animal studies (0.3 or 0.15 mmol/kg  
438 in this study) (Sudarshana et al., 2019). This low dose, necessitated by manganese toxicity,  
439 currently limits the clinical translatability of MEMRI for AD applications.

### 440 5 Conclusion

441 MnCl<sub>2</sub> falls short of GBCAs in its ability to enhance longitudinal relaxation, increase image  
442 resolution, and reduce scan time. However, it is much simpler to deliver to the brain  
443 parenchyma and still offers useful signal enhancement. Our results suggest that, at least in  
444 the 5xFAD mouse, this should be leveraged to increase spatial resolution rather than SNR  
445 in the context of visualizing senile plaques. Image resolution and plaque size appear to be  
446 the key factors in determining plaque visibility, with iron load playing an increasingly

447 important role as resolution and/or plaque size decrease. MEMRI also allows indirect  
448 detection of senile plaques. Mn(II) uptake was increased in regions of high plaque burden,  
449 consistent with neuronal hyperactivity as a result of plaque-related dysregulation, and  
450 perhaps enhanced by A $\beta$ -Mn(II) binding. Thus, MEMRI is a viable method for visualizing  
451 senile plaques and for obtaining functional insights in preclinical models of AD. This  
452 technique will be used in future longitudinal studies to monitor disease progression and  
453 therapeutic response.

454

## 455 6 Acknowledgements

456 Funding: This work was supported by the Alzheimer's Society [AS-PhD-18B-015] and  
457 internal funding as "pump-priming" for developing novel imaging methodologies.

458 The authors thank the Wohl Cellular Imaging Centre (<http://www.kclwcic.co.uk>) for the use  
459 of their slide scanner. SW would also like to thank the Wellcome Trust and Medical  
460 Research Council for their ongoing support of our neuroimaging research.

461 Declarations of interest: none

462

## 463 7 References

- 464 Aggarwal, M., et al. (2018). Nuclei-specific deposits of iron and calcium in the rat thalamus  
465 after status epilepticus revealed with quantitative susceptibility mapping (QSM). *J*  
466 *Magn Reson Imaging*, 47(2), 554-564. doi:10.1002/jmri.25777
- 467 Avants, B. B., et al. (2008). Symmetric diffeomorphic image registration with cross-  
468 correlation: evaluating automated labeling of elderly and neurodegenerative brain.  
469 *Med Image Anal*, 12(1), 26-41. doi:10.1016/j.media.2007.06.004
- 470 Badea, A., et al. (2019). Multivariate MR biomarkers better predict cognitive dysfunction in  
471 mouse models of Alzheimer's disease. *Magn Reson Imaging*, 60, 52-67.  
472 doi:10.1016/j.mri.2019.03.022
- 473 Brandt, M., et al. (2019). Manganese in PET imaging: Opportunities and challenges. *J*  
474 *Labelled Comp Radiopharm*, 62(8), 541-551. doi:10.1002/jlcr.3754
- 475 Busche, M. A., et al. (2008). Clusters of hyperactive neurons near amyloid plaques in a  
476 mouse model of Alzheimer's disease. *Science*, 321(5896), 1686-1689.  
477 doi:10.1126/science.1162844
- 478 Cohen, R. M., et al. (2013). A transgenic Alzheimer rat with plaques, tau pathology,  
479 behavioral impairment, oligomeric abeta, and frank neuronal loss. *J Neurosci*,  
480 33(15), 6245-6256. doi:10.1523/JNEUROSCI.3672-12.2013
- 481 Dahl, L. K. (1952). A simple and sensitive histochemical method for calcium. *Proc Soc Exp*  
482 *Biol Med*, 80(3), 474-479. doi:10.3181/00379727-80-19661
- 483 Dhenain, M., et al. (2009). Characterization of in vivo MRI detectable thalamic amyloid  
484 plaques from APP/PS1 mice. *Neurobiol Aging*, 30(1), 41-53.  
485 doi:10.1016/j.neurobiolaging.2007.05.018
- 486 Dietrich, O., et al. (2017). MR imaging differentiation of Fe(2+) and Fe(3+) based on  
487 relaxation and magnetic susceptibility properties. *Neuroradiology*, 59(4), 403-409.  
488 doi:10.1007/s00234-017-1813-3
- 489 Dietrich, P., et al. (2017). Elimination of huntingtin in the adult mouse leads to progressive  
490 behavioral deficits, bilateral thalamic calcification, and altered brain iron  
491 homeostasis. *PLoS Genet*, 13(7), e1006846. doi:10.1371/journal.pgen.1006846
- 492 Duffeffant, C., et al. (2017). Contrast-enhanced MR microscopy of amyloid plaques in five  
493 mouse models of amyloidosis and in human Alzheimer's disease brains. *Sci Rep*,  
494 7(1), 4955. doi:10.1038/s41598-017-05285-1
- 495 Fontaine, S. N., et al. (2017). Identification of changes in neuronal function as a  
496 consequence of aging and tauopathic neurodegeneration using a novel and  
497 sensitive magnetic resonance imaging approach. *Neurobiol Aging*, 56, 78-86.  
498 doi:10.1016/j.neurobiolaging.2017.04.007
- 499 Fraser, H. (1968). Bilateral thalamic calcification in ageing mice. *J Pathol Bacteriol*, 96(1),  
500 220-222. doi:10.1002/path.1700960124

- 501 Gong, N. J., et al. (2019). Imaging beta amyloid aggregation and iron accumulation in  
502 Alzheimer's disease using quantitative susceptibility mapping MRI. *Neuroimage*,  
503 191, 176-185. doi:10.1016/j.neuroimage.2019.02.019
- 504 Helms, G., & Dechent, P. (2009). Increased SNR and reduced distortions by averaging  
505 multiple gradient echo signals in 3D FLASH imaging of the human brain at 3T. *J*  
506 *Magn Reson Imaging*, 29(1), 198-204. doi:10.1002/jmri.21629
- 507 Jack, C. R., Jr., et al. (2018). NIA-AA Research Framework: Toward a biological definition  
508 of Alzheimer's disease. *Alzheimers Dement*, 14(4), 535-562.  
509 doi:10.1016/j.jalz.2018.02.018
- 510 Jack, C. R., Jr., et al. (2004). In vivo visualization of Alzheimer's amyloid plaques by  
511 magnetic resonance imaging in transgenic mice without a contrast agent. *Magn*  
512 *Reson Med*, 52(6), 1263-1271. doi:10.1002/mrm.20266
- 513 Lemos, R. R., et al. (2013). An update on primary familial brain calcification. *Int Rev*  
514 *Neurobiol*, 110, 349-371. doi:10.1016/B978-0-12-410502-7.00015-6
- 515 Lermyte, F., et al. (2019). Metal Ion Binding to the Amyloid beta Monomer Studied by  
516 Native Top-Down FTICR Mass Spectrometry. *J Am Soc Mass Spectrom*, 30(10),  
517 2123-2134. doi:10.1007/s13361-019-02283-7
- 518 Massaad, C. A., & Pautler, R. G. (2011). Manganese-enhanced magnetic resonance  
519 imaging (MEMRI). *Methods Mol Biol*, 711, 145-174. doi:10.1007/978-1-61737-992-  
520 5\_7
- 521 Mathis, C. A., et al. (2012). Development of positron emission tomography beta-amyloid  
522 plaque imaging agents. *Semin Nucl Med*, 42(6), 423-432.  
523 doi:10.1053/j.semnuclmed.2012.07.001
- 524 Mori, F., et al. (2000). Widespread calcium deposits, as detected using the alizarin red S  
525 technique, in the nervous system of rats treated with dimethyl mercury.  
526 *Neuropathology*, 20(3), 210-215. doi:10.1046/j.1440-1789.2000.00341.x
- 527 Ni, R., et al. (2019). Tau deposition is associated with imaging patterns of tissue  
528 calcification in the P301L mouse model of human tauopathy. *bioRxiv*, 851915.  
529 doi:10.1101/851915
- 530 O'Brien, K. R., et al. (2014). Robust T1-weighted structural brain imaging and morphometry  
531 at 7T using MP2RAGE. *PLoS One*, 9(6), e99676. doi:10.1371/journal.pone.0099676
- 532 Oakley, H., et al. (2006). Intraneuronal beta-amyloid aggregates, neurodegeneration, and  
533 neuron loss in transgenic mice with five familial Alzheimer's disease mutations:  
534 potential factors in amyloid plaque formation. *J Neurosci*, 26(40), 10129-10140.  
535 doi:10.1523/JNEUROSCI.1202-06.2006
- 536 Oguz, I., et al. (2014). RATS: Rapid Automatic Tissue Segmentation in rodent brain MRI. *J*  
537 *Neurosci Methods*, 221, 175-182. doi:10.1016/j.jneumeth.2013.09.021



- 538 Perez, P. D., et al. (2013). In vivo functional brain mapping in a conditional mouse model of  
539 human tauopathy (tauP301L) reveals reduced neural activity in memory formation  
540 structures. *Mol Neurodegener*, 8, 9. doi:10.1186/1750-1326-8-9
- 541 Petiet, A., et al. (2012). Gadolinium-staining reveals amyloid plaques in the brain of  
542 Alzheimer's transgenic mice. *Neurobiol Aging*, 33(8), 1533-1544.  
543 doi:10.1016/j.neurobiolaging.2011.03.009
- 544 Robinson, S. D., et al. (2017). Combining phase images from array coils using a short echo  
545 time reference scan (COMPOSER). *Magn Reson Med*, 77(1), 318-327.  
546 doi:10.1002/mrm.26093
- 547 Roschzttardtz, H., et al. (2009). Identification of the endodermal vacuole as the iron storage  
548 compartment in the Arabidopsis embryo. *Plant Physiol*, 151(3), 1329-1338.  
549 doi:10.1104/pp.109.144444
- 550 Saar, G., & Koretsky, A. P. (2018). Manganese Enhanced MRI for Use in Studying  
551 Neurodegenerative Diseases. *Front Neural Circuits*, 12, 114.  
552 doi:10.3389/fncir.2018.00114
- 553 Santin, M. D., et al. (2013). Fast in vivo imaging of amyloid plaques using mu-MRI Gd-  
554 staining combined with ultrasound-induced blood-brain barrier opening. *Neuroimage*,  
555 79, 288-294. doi:10.1016/j.neuroimage.2013.04.106
- 556 Schindelin, J., et al. (2012). Fiji: an open-source platform for biological-image analysis. *Nat*  
557 *Methods*, 9(7), 676-682. doi:10.1038/nmeth.2019
- 558 Sudarshana, D. M., et al. (2019). Manganese-Enhanced MRI of the Brain in Healthy  
559 Volunteers. *AJNR Am J Neuroradiol*, 40(8), 1309-1316. doi:10.3174/ajnr.A6152
- 560 Tang, X., et al. (2016). Spatial learning and memory impairments are associated with  
561 increased neuronal activity in 5XFAD mouse as measured by manganese-enhanced  
562 magnetic resonance imaging. *Oncotarget*, 7(36), 57556-57570.  
563 doi:10.18632/oncotarget.11353
- 564 Ten Kate, M., et al. (2018). MRI predictors of amyloid pathology: results from the EMIF-AD  
565 Multimodal Biomarker Discovery study. *Alzheimers Res Ther*, 10(1), 100.  
566 doi:10.1186/s13195-018-0428-1
- 567 Tustison, N. J., et al. (2010). N4ITK: improved N3 bias correction. *IEEE Trans Med*  
568 *Imaging*, 29(6), 1310-1320. doi:10.1109/TMI.2010.2046908
- 569 Wallin, C., et al. (2016). Characterization of Mn(II) ion binding to the amyloid-beta peptide in  
570 Alzheimer's disease. *J Trace Elem Med Biol*, 38, 183-193.  
571 doi:10.1016/j.jtemb.2016.03.009
- 572 Wei, H., et al. (2015). Streaking artifact reduction for quantitative susceptibility mapping of  
573 sources with large dynamic range. *NMR Biomed*, 28(10), 1294-1303.  
574 doi:10.1002/nbm.3383

- 575 Wideroe, M., et al. (2011). Longitudinal manganese-enhanced magnetic resonance imaging  
576 of delayed brain damage after hypoxic-ischemic injury in the neonatal rat.  
577 *Neonatology*, 100(4), 363-372. doi:10.1159/000328705
- 578 Winkler, A. M., et al. (2014). Permutation inference for the general linear model.  
579 *Neuroimage*, 92, 381-397. doi:10.1016/j.neuroimage.2014.01.060
- 580 Wood, T. C. (2018). QUIT: QUantitative Imaging Tools. *Journal of Open Source Software*,  
581 3(26), 656. doi:10.21105/joss.00656
